# Supplementary material
Source: PubMed Central journal article supplement (PMC2045512)
Supplement: jvirol_81_20_11267__1.pdf [file jvirol_81_20_11267__1.pdf]

Supplemental Table 1.  
cDNA Clones Isolated in this Study and Their Properties

| Transcript Group | Overlapping Gene (orientation)                         | S/AS relative to gene | Revised S/AS <sup>1</sup>           | Clone Name | Genome Position <sup>2</sup> | Polyadenylation Signal | Coding Prediction <sup>3</sup> | Unique Clone Number |
|------------------|--------------------------------------------------------|-----------------------|-------------------------------------|------------|------------------------------|------------------------|--------------------------------|---------------------|
| 1                | UL1 (S)                                                | S                     | S                                   | L-8-1-1    | 11549-12653                  |                        | C                              | 1                   |
| 2                | UL1 (S), UL2 (AS), UL3 (AS), UL4 (S), UL5 (S), UL6 (S) | S/AS                  | S/AS                                | pL321      | 11909-14737**                |                        | C                              | 2                   |
|                  |                                                        | S/AS                  | S/AS                                | pL249      | 12132-13043                  |                        | C                              | 3                   |
|                  |                                                        | S/AS                  | S/AS                                | pE10226    | 12202-14744**                |                        | C                              | 4                   |
| 3                | UL3 (AS), UL4 (S), UL5 (S), UL6 (S)                    | AS/S                  | AS/S                                | pL932      | 13061-14016                  |                        | C                              | 5                   |
|                  |                                                        | AS/S                  | AS/S                                | pL749      | 13063-14009                  |                        | C                              | 6                   |
|                  |                                                        | AS/S                  | AS/S                                | L-8-10-3   | 13069-14030                  |                        | C                              | 7                   |
|                  |                                                        | AS/S                  | AS/S                                | pL744      | 13071-14029                  |                        | C                              | 8                   |
|                  |                                                        | AS/S                  | AS/S                                | pL5112     | 13072-14031                  |                        | C                              | 9                   |
|                  |                                                        | AS/S                  | AS/S                                | pL444      | 13072-14030                  |                        | C                              | 10                  |
|                  |                                                        | AS/S                  | AS/S                                | pL8211     | 13076-14032                  |                        | C                              | 11                  |
|                  |                                                        | AS/S                  | AS/S                                | pL724      | 13076-14769*                 | 14747-14752            | C                              | 12                  |
|                  |                                                        | AS/S                  | AS/S                                | L-10-4-13  | 13076-14210                  |                        | C                              | 13                  |
|                  |                                                        | AS/S                  | AS/S                                | L-7-8-1-7  | 13076-14251                  |                        | C                              | 14                  |
|                  |                                                        | AS/S                  | AS/S                                | L-8-1-2    | 13076-14196                  |                        | C                              | 15                  |
|                  |                                                        | AS/S                  | AS/S                                | pL5310     | 13076-14178                  |                        | C                              | 16                  |
|                  |                                                        | AS/S                  | AS/S                                | L-10-2-3   | 13098-14209                  |                        | C                              | 17                  |
|                  |                                                        | AS/S                  | AS/S                                | pL5316     | 13101-14087                  |                        | C                              | 18                  |
|                  |                                                        | 4                     | UL3 (AS), UL4 (S), UL5 (S), UL6 (S) | AS/S       | AS/S                         | pL5313                 | 13256-14214                    |                     |
| AS/S             | AS/S                                                   |                       |                                     | pE10134    | 13258-14329                  |                        | C                              | 20                  |
| AS/S             | AS/S                                                   |                       |                                     | pE102214   | 13258-14354                  |                        | C                              | 21                  |
| AS/S             | AS/S                                                   |                       |                                     | pL1036     | 13258-14329                  |                        | C                              | 22                  |
| AS/S             | AS/S                                                   |                       |                                     | pE101037   | 13262-14349                  |                        | C                              | 23                  |
| AS/S             | AS/S                                                   |                       |                                     | pE101117   | 13263-14361                  |                        | C                              | 24                  |
| AS/S             | AS/S                                                   |                       |                                     | pL10310    | 13265-14273                  |                        | C                              | 25                  |
| AS/S             | AS/S                                                   |                       |                                     | pIE631     | 13267-14233                  |                        | C                              | 26                  |
| AS/S             | AS/S                                                   |                       |                                     | pE101222   | 13271-14352                  |                        | C                              | 27                  |
| AS/S             | AS/S                                                   |                       |                                     | pE102213   | 13274-14351                  |                        | C                              | 28                  |
| AS/S             | AS/S                                                   |                       |                                     | pE1012111  | 13283-14364                  |                        | C                              | 29                  |

|    |                                |      |      |           |                                          |             |      |    |
|----|--------------------------------|------|------|-----------|------------------------------------------|-------------|------|----|
|    |                                | AS/S | AS/S | pE1011111 | 13284-14433                              |             | C    | 30 |
|    |                                | AS/S | AS/S | pE10428   | 13284-14406                              |             | C    | 31 |
|    |                                | AS/S | AS/S | L-10-3-3  | 13376-14506                              |             | C    | 32 |
|    |                                | AS/S | AS/S | pL631     | 13540-14520                              |             | C    | 33 |
| 5  | UL5 (S), UL6 (S)               | S    | S    | pL316     | 13777-14767*                             | 14747-14752 | C    | 34 |
|    |                                | S    | S    | L-10-2-5  | 13925-14764*                             | 14747-14752 | C    | 35 |
|    |                                | S    | S    | pE103122  | 13944-14764*                             | 14747-14752 | C    | 36 |
| 6  | UL12 (AS), UL13 (S)            | AS/S | AS/S | pL1016    | 19140-19316 + 19414-20839*               | 20806-20811 | C    | 37 |
|    |                                | AS/S | AS/S | pL716     | 19140-19316 + 19414-20839*               | 20806-20811 | C    | 38 |
| 7  | UL13 (AS), UL12 (S), UL11 (AS) | AS/S | AS/S | pE102216  | 20406-19436 + 19336-18548*               | 18560-18555 | C/NC | 39 |
| 8  | UL13 (S)                       | S    | S    | pIE816    | 19328-20275                              |             | C    | 40 |
|    |                                | S    | S    | pL1042    | 19459-20356                              |             | C    | 41 |
|    |                                | S    | S    | pIE1037   | 19904-20810                              |             | C    | 42 |
| 9  | UL13 (S)                       | S    | S    | pIE5311   | 19408 -20250 + 20349-20833*              | 20806-20811 | C    | 43 |
| 10 | UL14 (S)                       | S    | S    | pE104210  | 20906-21374                              |             | C    | 44 |
| 11 | UL16 (S), UL17 (S)             | S    | S    | pIE227    | 23024-23648**                            |             | C    | 45 |
| 12 | UL19 (S), UL20 (S)             | S    | S    | E-9-1-4   | 24645-25701                              |             | C    | 46 |
|    |                                | S    | S    | pL636     | 24836-25816                              |             | C    | 47 |
| 13 | UL20 (S)                       | S    | S    | pIE612    | 25299-26266                              |             | C    | 48 |
|    |                                | S    | S    | pIE789    | 25344-26248                              |             | C    | 49 |
|    |                                | S    | S    | pIE1031   | 25344-26248                              |             | C    | 50 |
| 14 | UL20 (S), UL21 (AS), UL22A (S) | S/AS | S/AS | IE8-7-1-1 | 25303-25574 + 26637-27194 + 27279-27581* | 27551-27556 | C    | 51 |
|    |                                | S/AS | S/AS | pIE9-2-1  | 25314-25574 + 26637-27195 + 27275-27485* | 27464-27469 | C    | 52 |
| 15 | UL23 (S)                       | S    | S    | pIE9-2-2  | 28857-27918                              |             | C    | 53 |
| 16 | UL23 (AS)                      | AS   | AS   | pL7-5-1   | 27952-28903                              |             | C/NC | 54 |
| 17 | UL24 (AS), UL25 (S)            | AS/S | AS/S | pL3115    | 29510-30585                              |             | C/NC | 55 |
| 18 | UL24 (S), UL23 (S)             | S    | S    | pL5312    | 29806-27780*<br>(5' RACE: 30238, 30029)  | 27811-27806 | C    | 56 |
| 19 | UL24 (AS), UL25 (S)            | AS/S | AS/S | pL8212    | 28949-32166*<br>(5' RACE: 28023, 28411)  | 32114-32119 | C/NC | 57 |
|    |                                | AS/S | AS/S | pL715     | 28849-29720                              |             | C/NC | 58 |
| 20 | UL25 (S)                       | S    | S    | pL241     | 30024-30896                              |             | C    | 59 |
|    |                                | S    | S    | pL757     | 30028-30923                              |             | C    | 60 |

|    |                                           |      |      |          |                              |             |      |    |
|----|-------------------------------------------|------|------|----------|------------------------------|-------------|------|----|
|    |                                           | S    | S    | pL6414   | 30038-30962                  |             | C    | 61 |
|    |                                           | S    | S    | pL10311  | 30045-30955                  |             | C    | 62 |
| 21 | UL25 (AS), UL24 (S), UL23 (S)             | AS/S | AS/S | pIE811   | 31019-30116 --- 28579-27816* | 27811-27806 | C    | 63 |
| 22 | UL26 (S), UL27 (S)                        | S    | S    | pE104117 | 33422-32419                  |             | C    | 64 |
| 23 | UL27(AS), UL28 (AS), UL29 (AS), UL30 (AS) | AS   | AS   | pL551    | 33798-34671 --- 36336-37255* | 37236-37241 | C/NC | 65 |
| 24 | UL29 (S), UL22A (AS), UL21 (S)            | S/AS | S/AS | pIE526   | 37099-35929 + 27206-26444*   | 26470-26465 | C/NC | 66 |
|    |                                           | S/AS | S/AS | pIE912   | 37099-35929 + 27206-26444*   | 26470-26465 | C/NC | 67 |
|    |                                           | S/AS | S/AS | pIE626   | 37095-35929 + 27206-26444*   | 26470-26465 | C/NC | 68 |
| 25 | UL32 (S)                                  | S    | S    | pL2510   | 43071-42115                  |             | C    | 69 |
|    |                                           | S    | S    | pL326    | 43073-41988                  |             | C    | 70 |
|    |                                           | S    | S    | pL246    | 43060-42235                  |             | C    | 71 |
| 26 | UL32 (S)                                  | S    | S    | pL235    | 41852-40894                  |             | C    | 72 |
|    |                                           | S    | S    | pL1013   | 40847-39813                  |             | C    | 73 |
|    |                                           | S    | S    | pL1048   | 40847-39922                  |             | C    | 74 |
| 27 | UL33 (S)                                  | S    | S    | pL3212   | 43023-43089 + 43211-44234    |             | C    | 75 |
| 28 | UL33 (S)                                  | S    | S    | pL325    | 43214-44334                  |             | C    | 76 |
| 29 | UL33 (S)                                  | S    | S    | pL2515   | 43858-44789                  |             | C    | 77 |
| 30 | UL34 (S) (early)                          | S    | S    | pIE5212  | 44475-45443                  |             | C    | 78 |
|    |                                           | S    | S    | pIE625   | 44624-45583                  |             | C    | 79 |
|    |                                           | S    | S    | pIE223   | 44638-45432                  |             | C    | 80 |
|    |                                           | S    | S    | pIE224   | 44640-45587                  |             | C    | 81 |
|    |                                           | S    | S    | pIE618   | 44644-45583                  |             | C    | 82 |
|    |                                           | S    | S    | pIE336   | 44653-45610                  |             | C    | 83 |
|    |                                           | S    | S    | pIE523   | 44737-45687                  |             | C    | 84 |
| 31 | UL34 (S) (late)                           | S    | S    | pL639    | 44843-45756                  |             | C    | 85 |
|    |                                           | S    | S    | pL6212   | 44858-45785                  |             | C    | 86 |
|    |                                           | S    | S    | pIE1034  | 44874-45833                  |             | C    | 87 |
|    |                                           | S    | S    | pL6211   | 44858-46055*                 | 46031-46036 | C    | 88 |
| 32 | UL35 (S)                                  | S    | S    | pL533    | 46073-48078**                |             | C    | 89 |
| 33 | UL35 (S)                                  | S    | S    | pL6410   | 46221-47177                  |             | C    | 90 |
| 34 | UL35A (S)                                 | S    | S    | pL3214   | 46733-47791                  |             | C    | 91 |
| 35 | UL36 (S)                                  | S    | S    | pE10422  | 49791-49577 + 49473-48101*   | 48116-48111 | C    | 92 |
|    |                                           | S    | S    | IE-9-1-1 | 49827-49577 + 49473-48675    |             | C    | 93 |

|    |                                          |      |      |            |                                             |             |      |     |
|----|------------------------------------------|------|------|------------|---------------------------------------------|-------------|------|-----|
|    |                                          | S    | S    | pIE521     | 49846-49577 + 49473-48101*                  | 48116-48111 | C    | 94  |
| 36 | UL36 (AS), UL37 (AS)                     | AS   | AS   | pE104114   | 49135-51094**<br>(5' RACE: 49135, 48214)    |             | C/NC | 95  |
| 37 | UL37(S), UL38 (S)                        | S    | S    | pIE324     | 52725-50994*                                | 51017-51012 | C    | 96  |
|    |                                          | S    | S    | pL6313     | 52706-50994*                                | 51017-51012 | C    | 97  |
| 38 | UL37 (S)                                 | S    | S    | pIE788     | 52716-52160 + 51302-50999*                  | 51017-51012 | C    | 98  |
| 39 | UL37 (S), UL38 (S)                       | S    | S    | IE913      | 52450-51375                                 |             | C    | 99  |
| 40 | UL52 (AS), UL37 (S), UL36 (S)            | AS/S | AS/S | pL258      | 76158-76097 + 50590-49577<br>+ 49473-48094* | 48116-48111 | C    | 100 |
| 41 | UL43 (S), UL42 (S), UL41A (S), UL39 (AS) | S/AS | S/AS | pL5510     | 54966-54765 + 54651-53159**                 |             | C    | 101 |
| 42 | UL43 (S), UL42 (S)                       | S    | S    | IE-9-10-5  | 55793-54709                                 |             | C    | 102 |
|    |                                          | S    | S    | pIE1012    | 55681-54711                                 |             | C    | 103 |
|    |                                          | S    | S    | pL824      | 55573-54614                                 |             | C    | 104 |
|    |                                          | S    | S    | L-10-4-2   | 55115-54315*                                | 54329-54324 | C    | 105 |
| 43 | UL44 (S), UL43 (S), UL42 (S)             | S    | S    | pL812      | 56815-55975 + 54637-54519                   |             | C    | 106 |
| 44 | UL44 (S), UL43 (S)                       | S    | S    | pL5111     | 56952-56008                                 |             | C    | 107 |
|    |                                          | S    | S    | pE10419    | 56237-55166                                 |             | C    | 108 |
| 45 | UL43 (S)                                 | S    | S    | pL333      | 55022- 54941                                |             | C    | 109 |
| 46 | UL44 (S)                                 | S    | S    | pL216      | 57553-56638                                 |             | C    | 110 |
|    |                                          | S    | S    | pIE325     | 57457-56475                                 |             | C    | 111 |
|    |                                          | S    | S    | L-8-2-7    | 57454-56447                                 |             | C    | 112 |
|    |                                          | S    | S    | L-10-3-1   | 57434-56464                                 |             | C    | 113 |
| 47 | UL44 (S), UL42 (S), UL41A (S)            | S    | S    | pL525      | 56424-55992 + 54798-54122                   |             | C    | 114 |
| 48 | UL45 (S)                                 | S    | S    | pL1044     | 58883-57944                                 |             | C    | 115 |
| 49 | UL47(AS), UL46 (S)                       | AS/S | AS/S | ie-9-10-16 | 61988-60972                                 |             | C    | 116 |
| 50 | UL49 (S), UL48A (S), UL48 (AS)           | S/AS | S/AS | pL238      | 71790-70857                                 |             | C    | 117 |
|    |                                          | S/AS | S/AS | pL4410     | 71393-70411                                 |             | C    | 118 |
|    |                                          | S/AS | S/AS | pE1012115  | 71364-70276                                 |             | C    | 119 |
| 51 | UL49 (S), UL48A (S), UL48 (AS)           | S/AS | S/AS | pE1011210  | 71672-71537 + 71392-70063*<br>70082-70077   |             | C    | 120 |
| 52 | UL49 (S)                                 | S    | S    | pL632      | 72951-72028                                 |             | C    | 121 |
|    |                                          | S    | S    | pL723      | 72951-72012                                 |             | C    | 122 |
| 53 | UL50 (S), UL49 (S)                       | S    | S    | pE101125   | 73918-72813                                 |             | C    | 123 |
| 54 | UL52 (S)                                 | S    | S    | pE10135    | 75394-76430                                 |             | C    | 124 |

|    |                                                                                             |      |      |          |                              |             |    |     |
|----|---------------------------------------------------------------------------------------------|------|------|----------|------------------------------|-------------|----|-----|
| 55 | UL52 (S), UL53 (S)                                                                          | S    | S    | pL319    | 76587-77486                  |             | C  | 125 |
|    |                                                                                             | S    | S    | pL726    | 76587-77557                  |             | C  | 126 |
|    |                                                                                             | S    | S    | L-10-4-1 | 76598-77605                  |             | C  | 127 |
|    |                                                                                             | S    | S    | pL5210   | 76605-77687                  |             | C  | 128 |
|    |                                                                                             | S    | S    | pL327    | 76629-77679                  |             | C  | 129 |
| 56 | UL53 (S)                                                                                    | S    | S    | pL3111   | 76752-77667                  |             | C  | 130 |
| 57 | UL55 (S), UL56 (S)                                                                          | S    | S    | pL8210   | 84769-83863                  |             | C  | 131 |
|    |                                                                                             | S    | S    | pL649    | 84770-83820                  |             | C  | 132 |
| 58 | UL61(AS), UL62 (AS),<br>UL63 (S), UL64 (AS)                                                 | AS/S | S    | pL252    | 94158-94394 --- 96396-97188* | Genomic pA  | NC | 133 |
| 59 | UL61(AS), UL62 (AS),<br>UL63 (S), UL64 (AS), UL65<br>(S), UL66 (AS), UL67(AS),<br>UL68 (AS) | AS/S | S/AS | pL629    | 94162-94386 --- 97770-98837* | 98806-98811 | NC | 134 |
|    |                                                                                             | AS/S | S/AS | pL638    | 94162-94363 --- 97949-98837* | 98806-98811 | NC | 135 |
|    |                                                                                             | AS/S | S/AS | pL831    | 94237-94575 --- 97919-98837* | 98806-98811 | NC | 136 |
| 60 | UL61(AS), UL62 (AS),<br>UL63 (S), UL64 (AS), UL65<br>(S), UL66 (AS), UL67(AS),<br>UL68 (AS) | AS/S | S/AS | pE103314 | 94462-95362 --- 97789-98837* | 98806-98811 | NC | 137 |
|    |                                                                                             | AS/S | S/AS | pE10335  | 94467-98837*                 | 98806-98811 | NC | 138 |
|    |                                                                                             | AS/S | S/AS | pE109512 | 94649-95667 --- 97798-98837* | 98806-98811 | NC | 139 |
| 61 | UL61 (AS), UL62 (AS),<br>UL63 (S)                                                           | AS/S | S    | pL7210   | 94833-95516                  |             | NC | 140 |
|    |                                                                                             | AS/S | S    | pL6210   | 95047-95697 --- 96029-96735  | Genomic pA  | NC | 141 |
| 62 | UL61(AS), UL62 (AS),<br>UL63 (S), UL64 (AS), UL65<br>(S), UL66 (AS), UL67(AS),<br>UL68 (AS) | AS/S | S/AS | pL756    | 94837-95739 --- 97856-98837* | 98806-98811 | NC | 142 |
| 63 | UL62 (AS), UL63 (S), UL64<br>(AS)                                                           | AS/S | S    | pE101124 | 95065-96185 --- 96229-97188* | Genomic pA  | NC | 143 |
| 64 | UL62 (AS), UL63 (S), UL64<br>(AS), UL65 (S), UL66 (AS),<br>UL67(AS), UL68 (AS)              | AS/S | S/AS | pL937    | 95415-96478 --- 97849-98837* | 98806-98811 | NC | 144 |
| 65 | UL63 (S), UL64 (AS), UL65<br>(S), UL66 (AS), UL67(AS),<br>UL68 (AS)                         | S/AS | S/AS | pL5317   | 95749-96669 --- 98258-98837* | 98806-98811 | NC | 145 |
| 66 | UL63(S), UL64 (AS), UL65<br>(S)                                                             | S/AS | S    | pL6312   | 95947-97297 --- 96382-97297* | Genomic pA  | NC | 146 |
| 67 | UL63 (S), UL64 (AS), UL65<br>(S), UL66 (AS), UL67(AS),<br>UL68 (AS)                         | S/AS | S/AS | pL524    | 96042-97185 --- 98255-98837* | 98806-98811 | NC | 147 |
|    |                                                                                             | S/AS | S/AS | pE10338  | 96047-97186 --- 98019-       | 98806-98811 | NC | 148 |

|    |                                                                        |      |      |          | 98840*                         |               |      |     |
|----|------------------------------------------------------------------------|------|------|----------|--------------------------------|---------------|------|-----|
|    |                                                                        | S/AS | S/AS | pE10415  | 96054-97116 --- 97759-98837*   | 98806-98811   | NC   | 149 |
|    |                                                                        | S/AS | S/AS | pL832    | 96278-97306                    |               | NC   | 150 |
|    |                                                                        | S/AS | S/AS | pL754    | 96440-97391                    |               | NC   | 151 |
| 68 | UL64 (AS), UL65 (S), UL66 (AS), UL67(AS), UL68 (AS)                    | AS/S | S/AS | pL647    | 96681-97492 --- 97787-98837*   | 98806-98811   | NC   | 152 |
| 69 | UL64 (AS), UL65 (S), UL66 (AS), UL67(AS), UL68 (AS)                    | AS/S | S/AS | pE10953  | 96848-97867                    |               | NC   | 153 |
|    |                                                                        | AS/S | S/AS | pL338    | 96875-98837*                   | 98806-98811   | NC   | 154 |
|    |                                                                        | AS/S | S/AS | pL717    | 97108-98405 + 98425-98837*     | 98806-98811   | NC   | 155 |
|    |                                                                        | AS/S | S/AS | pL814    | 97184-98119                    |               | NC   | 156 |
| 70 | UL65 (AS), UL64 (S), UL63 (AS), UL62 (S), UL61 (S)                     | AS/S | AS   | pL233    | 97297-96388 --- 95728-94779*   | 94780-94795   | NC   | 157 |
| 71 | UL65 (AS), UL64 (S)                                                    | S/AS | AS   | pL5110   | 97271-96690*                   | Genomic pA    | NC   | 158 |
| 72 | UL64 (S), UL63 (AS), UL62 (S)                                          | S/AS | AS   | pL729    | 96952-95654*                   | Genomic pA    | NC   | 159 |
| 73 | UL66 (AS), UL67 (AS)                                                   | AS   | AS   | L-8-1-4  | 97641-98659                    |               | NC   | 160 |
| 74 | UL67 (S), UL66 (S), UL65 (AS), UL64 (S), UL63 (AS), UL62 (S), UL61 (S) | S/AS | S/AS | pL537    | 98430-97872-----94967-94531    |               | NC   | 161 |
| 75 | UL70 (S)                                                               | S    | S    | pL821    | 102646-101890 + 101821-101660  |               | C    | 162 |
| 76 | UL70 (AS)                                                              | AS   | AS   | pL933    | 101714-102524                  |               | C/NC | 163 |
|    |                                                                        | AS   | AS   | pL345    | 101714-102672                  |               | C/NC | 164 |
| 77 | UL70 (AS), UL71 (S), UL72 (AS)                                         | AS/S | AS/S | pL5511   | 102599-103523---104754-105546* | 105527-105532 | C/NC | 165 |
|    |                                                                        | AS/S | AS/S | pie226   | 104256-105175                  |               | C/NC | 166 |
| 78 | UL71 (S)                                                               | S    | S    | pL337    | 104326-105085                  |               | C    | 167 |
| 79 | UL72 (S)                                                               | S    | S    | pL643    | 106572-105638                  |               | C    | 168 |
| 80 | UL72 (AS), UL73 (S), UL74 (AS)                                         | AS/S | AS/S | pE104111 | 105765-107122 + 108462-108697* | 108660-108665 | C/NC | 169 |
|    |                                                                        | AS/S | AS/S | pL6311   | 106326-107122 + 108462-108697* | 108660-108665 | C/NC | 170 |
|    |                                                                        | AS/S | AS/S | L-10-1-4 | 106595-107122 + 108462-108697* | 108660-108665 | C/NC | 171 |
| 81 | UL74 (S), UL73 (AS)                                                    | S/AS | S/AS | pL635    | 107552-106644                  |               | C    | 172 |
| 82 | UL77 (S)                                                               | S    | S    | pL745    | 112393-113357                  |               | C    | 173 |
| 83 | UL77 (S), UL78 (S)                                                     | S    | S    | pL536    | 113371-114437                  |               | C    | 174 |
|    |                                                                        | S    | S    | pL1029   | 113746-114797                  |               | C    | 175 |

|    |                                   |      |   |          |                                      |               |   |     |
|----|-----------------------------------|------|---|----------|--------------------------------------|---------------|---|-----|
|    |                                   | S    | S | L10-2-7  | 113746-114832                        |               | C | 176 |
|    |                                   | S    | S | pL10410  | 113746-114345                        |               | C | 177 |
|    |                                   | S    | S | pE104110 | 113830-114873                        |               | C | 178 |
| 84 | UL78 (S)                          | S    | S | pIE322   | 114199-115181                        |               | C | 179 |
| 85 | UL79 (AS), UL80 (S)               | AS/S | S | pL615    | 115665-116627                        |               | C | 180 |
| 86 | UL79 (AS), UL80 (S),<br>UL80A (S) | AS/S | S | pL342    | 116056-117116                        |               | C | 181 |
| 87 | UL83 (S), UL82 (S), UL81<br>(S)   | S    | S | pL826    | 121989-121037 --- 119268-<br>118328* | 118350-118345 | C | 182 |
| 88 | UL83 (S)                          | S    | S | pL5513   | 121990-121022                        |               | C | 183 |
|    |                                   | S    | S | pL236    | 121990-121040                        |               | C | 184 |
|    |                                   | S    | S | pL3114   | 121989-120896                        |               | C | 185 |
|    |                                   | S    | S | pL556    | 121988-121037                        |               | C | 186 |
|    |                                   | S    | S | pL721    | 121986-121022                        |               | C | 187 |
|    |                                   | S    | S | pL175    | 121985-120908                        |               | C | 188 |
|    |                                   | S    | S | pL4112   | 121984-121037                        |               | C | 189 |
|    |                                   | S    | S | pL215    | 121983-121024                        |               | C | 190 |
|    |                                   | S    | S | pL1047   | 121963-121329                        |               | C | 191 |
|    |                                   | S    | S | pL5512   | 121963-121000                        |               | C | 192 |
|    |                                   | S    | S | pL911    | 121960-121022                        |               | C | 193 |
|    |                                   | S    | S | pL10110  | 121862-120884                        |               | C | 194 |
|    |                                   | S    | S | pL211    | 121642-120605                        |               | C | 195 |
|    |                                   | S    | S | pL816    | 121630-120707                        |               | C | 196 |
|    |                                   | S    | S | pL2512   | 121514-120611                        |               | C | 197 |
|    |                                   | S    | S | pL722    | 121369-120511                        |               | C | 198 |
| 89 | UL83 (S), UL82 (S)                | S    | S | pL171    | 121195-120112                        |               | C | 199 |
|    |                                   | S    | S | pL959    | 121195-120112                        |               | C | 200 |
| 90 | UL83 (S), UL82 (S)                | S    | S | pL6310   | 120968-120023                        |               | C | 201 |
|    |                                   | S    | S | pL532    | 120699-119685                        |               | C | 202 |
| 91 | UL82 (S), UL81 (S)                | S    | S | pL223    | 120129-118328*                       | 118350-118345 | C | 203 |
|    |                                   | S    | S | pIE527   | 120180-119180                        |               | C | 204 |
|    |                                   | S    | S | pL234    | 120110-119193                        |               | C | 205 |
|    |                                   | S    | S | pL225    | 120107-119272                        |               | C | 206 |
|    |                                   | S    | S | pL244    | 120043-119096                        |               | C | 207 |
|    |                                   | S    | S | pL555    | 119895-118947                        |               | C | 208 |

|     |                                                                         |      |      |           |                                                   |                |      |     |
|-----|-------------------------------------------------------------------------|------|------|-----------|---------------------------------------------------|----------------|------|-----|
|     |                                                                         | S    | S    | pL226     | 120110-119200                                     |                | C    | 209 |
| 92  | UL85 (S), UL84 (S)                                                      | S    | S    | pL753     | 124086-123138                                     |                | C    | 210 |
| 93  | UL84 (S)                                                                | S    | S    | pL5314    | 124003-122126**                                   |                | C    | 211 |
| 94  | UL84 (S)                                                                | S    | S    | pL742     | 123996-123064                                     |                | C    | 212 |
|     |                                                                         | S    | S    | pL1041    | 123981-123040                                     |                | C    | 213 |
|     |                                                                         | S    | S    | pL511     | 123976-122853                                     |                | C    | 214 |
|     |                                                                         | S    | S    | pL743     | 123976-123042                                     |                | C    | 215 |
|     |                                                                         | S    | S    | pL315     | 123702-122632                                     |                | C    | 216 |
| 95  | UL85 (S)                                                                | S    | S    | pL1015    | 125075-124025                                     |                | C    | 217 |
|     |                                                                         | S    | S    | pIE6110   | 125109-123510*                                    | Genomic pA     | C    | 218 |
| 96  | UL88 (S), UL89 (AS) [UL90 (AS), UL91 (S), UL92 (S), UL93 (S), UL94 (S)] | S/AS | S/AS | pL725     | 132459-133401 --- 137378-138370*                  | Genomic pA     | C    | 219 |
| 97  | UL88 (AS), UL87 (AS)                                                    | AS   | AS   | pL339     | 133049-132010 --- 131325-130420*                  | 130444 -130439 | C/NC | 220 |
| 98  | UL89 (AS) [UL93 (S), UL94 (S)]                                          | AS/S | AS/S | pL331     | 136548-137633                                     |                | C    | 221 |
| 99  | UL89 (S), [UL92 (AS)], UL88 (AS), UL87 (AS)                             | S/AS | S/AS | pL2212    | 135422-135179 + 134530-133843 --- 131318-130420*  | 130444-130439  | C/NC | 222 |
| 100 | UL95 (S), UL96 (S), UL97 (S), UL98 (S), UL99 (S)                        | S    | S    | pIE628    | 140607-141297 + 142762-143950 --- 144665-145663*  | Genomic pA     | C    | 223 |
| 101 | UL97 (S), UL98 (S)                                                      | S    | S    | pL711     | 142065-143027                                     |                | C    | 224 |
|     |                                                                         | S    | S    | pIE334    | 142523-143456                                     |                | C    | 225 |
|     |                                                                         | S    | S    | pL231     | 142593-143520                                     |                | C    | 226 |
|     |                                                                         | S    | S    | pIE918    | 142689-143645                                     |                | C    | 227 |
|     |                                                                         | S    | S    | pIE925    | 142791-143723                                     |                | C    | 228 |
|     |                                                                         | S    | S    | pL314     | 143259-144391                                     |                | C    | 229 |
|     |                                                                         | S    | S    | pL346     | 143259-144362                                     |                | C    | 230 |
| 102 | UL98 (S), UL99 (S)                                                      | S    | S    | pE103120  | 144365-145420                                     |                | C    | 231 |
|     |                                                                         | S    | S    | pIE8110   | 144588-145504                                     |                | C    | 232 |
|     |                                                                         | S    | S    | pE1012120 | 144663-145724                                     |                | C    | 233 |
|     |                                                                         | S    | S    | pL759     | 145101-146092*                                    | 140666-146071  | C    | 234 |
|     |                                                                         | S    | S    | pL613     | 145158-146091                                     |                | C    | 235 |
| 103 | UL102 (AS), UL100 (S)                                                   | AS/S | AS/S | L-8-2-5   | 147941-146085**                                   |                | C    | 236 |
| 104 | UL100 (S)                                                               | S    | S    | pE102221  | 147432-146346                                     |                | C    | 237 |
| 105 | UL102 (S)                                                               | S    | S    | pL1035    | 147599-147645 + 147829-148479 + 148561-148853 --- |                | C    | 238 |



|     |                                                          |      |      |            | 149714-150156**                                                                |               |      |     |  |
|-----|----------------------------------------------------------|------|------|------------|--------------------------------------------------------------------------------|---------------|------|-----|--|
| 106 | UL102 (S)                                                | S    | S    | pL2211     | 147885-148823 --- 149273-150185*                                               | 150163-150168 | C    | 239 |  |
| 107 | UL102 (AS)                                               | AS   | AS   | pL222      | 150176-148864*<br>(5' RACE: 150484)                                            | 148883-148878 | C/NC | 240 |  |
| 108 | UL107 (AS), UL108 (S)                                    | AS/S | AS/S | pIE8112    | 156668-157610                                                                  |               | C/NC | 241 |  |
|     |                                                          | AS/S | AS/S | pL727      | 156668-157596                                                                  |               | C/NC | 242 |  |
| 109 | UL111 (S), UL110 (S)                                     | S    | S    | pL6316     | 160527-159603                                                                  |               | NC   | 243 |  |
|     |                                                          | S    | S    | pL935      | 160538-159529                                                                  |               | NC   | 244 |  |
|     |                                                          | S    | S    | IE-9-1-5   | 160527-158858*                                                                 | Genomic pA    | NC   | 245 |  |
|     |                                                          | S    | S    | L-10-4-16  | 160527-158858*                                                                 | Genomic pA    | NC   | 246 |  |
| 110 | UL110 (S), UL109 (S)                                     | S    | S    | pL748      | 159392-158443                                                                  |               | NC   | 247 |  |
| 111 | UL110 (S), UL109 (S)                                     | S    | S    | pL5211     | 159179-158132                                                                  |               | NC   | 248 |  |
|     |                                                          | S    | S    | pL322      | 158895-157838                                                                  |               | NC   | 249 |  |
|     |                                                          | S    | S    | pL212      | 158895-157844                                                                  |               | NC   | 250 |  |
| 112 | UL108 (AS)                                               | AS   | AS   | pIE2212    | 158186-157307                                                                  |               | NC   | 251 |  |
| 113 | UL111 (AS), UL111A (S)                                   | AS/S | AS/S | pL2513     | 159233-159303 + 159588-159684 + 160340-161143                                  |               | C    | 252 |  |
| 114 | UL111 (AS)                                               | AS   | AS   | pIE538     | 160069-160527*                                                                 | Genomic pA    | C/NC | 253 |  |
| 115 | UL111A (AS), UL111 (S), UL106 (S)                        | AS/S | AS/S | pL539      | 161296-160563 + 156034-155740*                                                 | 155760-155755 | C/NC | 254 |  |
| 116 | UL112 (S)                                                | S    | S    | IE-9-10-13 | 161486-162276 + 162434-162693                                                  |               | C    | 255 |  |
|     |                                                          | S    | S    | pIE1036    | 161458-162276 + 162434-162545                                                  |               | C    | 256 |  |
| 117 | UL112 (S)                                                | S    | S    | pL6315     | 162217-163084 + 163119-163144                                                  |               | C    | 257 |  |
| 118 | UL112 (S)                                                | S    | S    | IE-9-10-17 | 162555-162712 + 163116-163865                                                  |               | C    | 258 |  |
| 119 | UL112 (S)                                                | S    | S    | pIE638     | 163633-163865                                                                  |               | C    | 259 |  |
| 120 | UL117 (S), UL112 (AS), UL111A (AS), UL111 (S), UL106 (S) | S/AS | S/AS | pL3211     | 167651-167143 + 167081-167001 + 162130-160560 + 161221-160563 + 156037-155740* | 155760-155755 | C    | 260 |  |
| 121 | UL115 (S), UL114 (S)                                     | S    | S    | IE-10-1-2  | 165457-164588                                                                  |               | C    | 261 |  |
|     |                                                          | S    | S    | L-8-2-2    | 165500-164877                                                                  |               | C    | 262 |  |
| 122 | UL116 (S), UL115 (S), UL114 (S)                          | S    | S    | pIE834     | 165821-165594 + 165466-164613**                                                |               | C    | 263 |  |
| 123 | UL116 (S), UL115 (S)                                     | S    | S    | pIE923     | 166023-165079                                                                  |               | C    | 264 |  |

|     |                        |    |    |           |                                                                                                 |               |      |     |
|-----|------------------------|----|----|-----------|-------------------------------------------------------------------------------------------------|---------------|------|-----|
| 124 | UL115 (AS), UL116 (AS) | AS | AS | pL449     | 164758-165197 + 165300-165424 + 165566-165665 + 165772-166039                                   |               | C/NC | 265 |
|     |                        | AS | AS | pL237     | 164758-165197 + 165300-165424 + 165566-165665 + 165772-166039                                   |               | C/NC | 266 |
| 125 | UL122 (S)              | S  | S  | IE-10-1-3 | 173702-173626 + 173511-173327 + 171781-171567 + 171314-170188*                                  | 170206-170201 | C    | 267 |
| 126 | UL122 (S)              | S  | S  | pL718     | 171516-170188*                                                                                  | 170206-170201 | C    | 268 |
|     |                        | S  | S  | pL256     | 171511-170188*                                                                                  | 170206-170201 | C    | 269 |
| 127 | UL122 (S)              | S  | S  | pIE614    | 174649-174541 + 173713-173626 + 173511-173327 + 171781-171567 + 171237-170943                   |               | C    | 270 |
|     |                        | S  | S  | pIE6310   | 174648-174541 + 173713-173626 + 173511-173327 + 171781-171567 + 171237-170943 + 170477-170205** |               | C    | 271 |
|     |                        | S  | S  | pIE1015   | 174643-174541 + 173713-173626 + 173511-173327 + 171781-171567 + 171237-170954                   |               | C    | 272 |
| 128 | UL123 (S)              | S  | S  | pIE326    | 174644-174541 + 173713-173626 + 173511-173327 + 173156-171814*                                  | 171842-171837 | C    | 273 |
|     |                        | S  | S  | pIE915    | 174654-174541 + 173713-173626 + 173511-173327 + 173156-171814*                                  | 171842-171837 | C    | 274 |
|     |                        | S  | S  | pIE817    | 174566-174541 + 173713-173626 + 173511-173327 + 173156-171814*                                  | 171842-171837 | C    | 275 |
|     |                        | S  | S  | pIE5210   | 174642-174541 + 173713-173626 + 173511-173327 + 173156-171814*                                  | 171842-171837 | C    | 276 |
|     |                        | S  | S  | pIE721    | 174657-174541 + 173713-173626 + 173511-173327 + 173156-171814*                                  | 171842-171837 | C    | 277 |
|     |                        | S  | S  | pIE714    | 174636-174541 + 173713-173626 + 173511-173327 + 173156-172554                                   |               | C    | 278 |
|     |                        | S  | S  | pIE8111   | 174610-174541 + 173713-173626 + 173511-173327 + 173156-171814*                                  | 171842-171837 | C    | 279 |

|     |           |   |            |                                                                |                                |               |     |     |
|-----|-----------|---|------------|----------------------------------------------------------------|--------------------------------|---------------|-----|-----|
|     | S         | S | pIE783     | 174644-174541 + 173713-173626 + 173511-173327 + 173156-171814* | 171842-171837                  | C             | 280 |     |
|     | S         | S | pIE813     | 174644-174541 + 173713-173626 + 173511-173327 + 173156-171814* | 171842-171837                  | C             | 281 |     |
|     | S         | S | pIE627     | 174635-174541 + 173713-173626 + 173511-173327 + 173156-171814* | 171842-171837                  | C             | 282 |     |
|     | S         | S | pIE927     | 174649-174541 + 173713-173626 + 173511-173327 + 173156-172575  |                                | C             | 283 |     |
|     | S         | S | pIE818     | 174644-174541 + 173713-173626 + 173511-173327 + 173156-171814* | 171842-171837                  | C             | 284 |     |
|     | S         | S | pIE815     | 174617-174541 + 173713-173626 + 173511-173327 + 173156-172554  |                                | C             | 285 |     |
|     | S         | S | pIE622     | 174617-174541 + 173713-173626 + 173511-173327 + 173156-171814* | 171842-171837                  | C             | 286 |     |
|     | S         | S | IE-9-1-7   | 174620-174541 + 173713-173626 + 173511-173327 + 173156-171814* | 171842-171837                  | C             | 287 |     |
|     | S         | S | IE-9-1-13  | 174607-174541 + 173713-173626 + 173511-173327 + 173156-171814* | 171842-171837                  | C             | 288 |     |
|     | S         | S | IE-9-10-15 | 174610-174541 + 173713-173626 + 173511-173327 + 173156-171814* | 171842-171837                  | C             | 289 |     |
|     | S         | S | IE-9-10-8  | 174556-174541 + 173713-173626 + 173511-173327 + 173156-171814* | 171842-171837                  | C             | 290 |     |
|     | S         | S | IE-9-1-8   | 173713-173626 + 173511-173327 + 173156-172462                  |                                | C             | 291 |     |
|     | S         | S | IE-10-1-6  | 173713-173626 + 173511-173327 + 173156-171814*                 | 171842-171837                  | C             | 292 |     |
|     | S         | S | IE-9-2-9   | 173713-173626 + 173511-173327 + 173156-171814*                 | 171842-171837                  | C             | 293 |     |
| 129 | UL123 (S) | S | S          | pIE814                                                         | 173426-173327 + 173156-171814* | 171842-171837 | C   | 294 |
|     |           | S | S          | pIE639                                                         | 173157-171814*                 | 171842-171837 | C   | 295 |
|     |           | S | S          | pIE634                                                         | 173157-171814*                 | 171842-171837 | C   | 296 |

|     |                                             |   |   |            |                                                                   |               |   |     |
|-----|---------------------------------------------|---|---|------------|-------------------------------------------------------------------|---------------|---|-----|
|     |                                             | S | S | pIE333     | 173107-171814*                                                    | 171842-171837 | C | 297 |
|     |                                             | S | S | IE-9-10-4  | 173128-171814*                                                    | 171842-171837 | C | 298 |
|     |                                             | S | S | pIE724     | 173102-171814*                                                    | 171842-171837 | C | 299 |
|     |                                             | S | S | pIE335     | 173076-172132                                                     |               | C | 300 |
|     |                                             | S | S | IE-10-1-7  | 172924-171814*                                                    | 171842-171837 | C | 301 |
|     |                                             | S | S | IE-10-1-5  | 172846-171821                                                     |               | C | 302 |
|     |                                             | S | S | IE-9-2-8   | 172848-171820                                                     |               | C | 303 |
|     |                                             | S | S | IE-9-10-10 | 172682-171814*                                                    | 171842-171837 | C | 304 |
|     |                                             | S | S | pIE535     | 172658-171814*                                                    |               | C | 305 |
|     |                                             | S | S | pIE2210    | 172477-171814*                                                    | 171842-171837 | C | 306 |
|     |                                             | S | S | pIE613     | 172475-171814*                                                    | 171842-171837 | C | 307 |
|     |                                             | S | S | pIE528     | 172472-171814*                                                    | 171842-171837 | C | 308 |
|     |                                             | S | S | pIE836     | 172436-171814*                                                    | 171842-171837 | C | 309 |
|     |                                             | S | S | pE1012215  | 172423-171814*                                                    | 171842-171837 | C | 310 |
|     |                                             | S | S | IE-9-2-5   | 172100-171814*                                                    | 171842-171837 | C | 311 |
|     |                                             | S | S | IE-10-1-8  | 172098-171814*                                                    | 171842-171837 | C | 312 |
| 130 | UL123 (S)                                   | S | S | IE-9-2-7   | 172851-172790 + 172690-172131                                     | 172160-172155 | C | 313 |
| 131 | UL131A (S), UL130 (S), UL129 (S), UL128 (S) | S | S | pL1045     | 177754-177520 + 177411-176132 + 176012-175770*                    | 175793-175788 | C | 314 |
|     |                                             | S | S | pL247      | 177592-177520 + 177411-176762                                     |               | C | 315 |
|     |                                             | S | S | pIE531     | 177737-177520 + 177411-176665 + 176266 + 176132 + 176012-175770** |               | C | 316 |
|     |                                             | S | S | pL5212     | 177736-176132 + 176012-175770**                                   |               | C | 317 |
| 132 | UL132 (S), UL148 (S)                        | S | S | pE101218   | 179045-177991                                                     |               | C | 318 |
|     |                                             | S | S | pL518      | 179019-177953                                                     |               | C | 319 |
|     |                                             | S | S | pL5318     | 179015-178377                                                     |               | C | 320 |
|     |                                             | S | S | L-10-4-15  | 178862-177816                                                     |               | C | 321 |
| 133 | IRL12 (S), IRL13 (S), UL148 (S), UL132 (S)  | S | S | pL443      | 179831-178877 --- 178652-177754*                                  | 177784-177779 | C | 322 |
| 134 | IRL13 (S), UL148 (S), UL132 (S)             | S | S | pL523      | 179652-178559                                                     |               | C | 323 |
|     |                                             | S | S | pL413      | 179649-178695                                                     |               | C | 324 |
|     |                                             | S | S | pL713      | 179640-178712                                                     |               | C | 325 |
| 135 | RL14 (S), RL13 (S), UL148                   | S | S | L-10-1-8   | 179169-178106                                                     |               | C | 326 |

(S), UL132 (S)

|     |                   |      |      |           |                |               |      |     |
|-----|-------------------|------|------|-----------|----------------|---------------|------|-----|
| 136 | RL1(S), RL2 (S)   | S    | S    | pE101127  | 986-1993       |               | C    | 327 |
| 137 | RL2 (S)           | S    | S    | pE103310  | 2091-2921      |               | NC   | 328 |
|     |                   | S    | S    | pE103213  | 2096-3096      |               | NC   | 329 |
|     |                   | S    | S    | pE10229   | 2096-3016      |               | NC   | 330 |
|     |                   | S    | S    | E-8-2-1   | 2096-3096      |               | NC   | 331 |
|     |                   | S    | S    | pL179     | 2096-2921      |               | NC   | 332 |
| 138 | RL2 (AS)          | AS   | AS   | pE101038  | 3176-2091*     | 2113-2108     | C/NC | 333 |
|     |                   | AS   | AS   | pE10225   | 187248-188307* | 188285-188290 | C/NC | 334 |
|     |                   | AS   | AS   | L-10-3-5  | 187277-188307* | 188285-188290 | C/NC | 335 |
|     |                   | AS   | AS   | pE10127   | 3118-2297      |               | C/NC | 336 |
|     |                   | AS   | AS   | pL332     | 187320-188307* | 188285-188290 | C/NC | 337 |
|     |                   | AS   | AS   | L-10-4-10 | 3037-2091*     | 2113-2108     | C/NC | 338 |
|     |                   | AS   | AS   | E-9-1-2   | 2960-2091      | 2113-2108     | C/NC | 339 |
|     |                   | AS   | AS   | pE10332   | 2896-2091      | 2113-2108     | C/NC | 340 |
|     |                   | AS   | AS   | pE1012110 | 2855-2091      | 2113-2108     | C/NC | 341 |
|     |                   | AS   | AS   | pE101114  | 2839-2091      | 2113-2108     | C/NC | 342 |
|     |                   | AS   | AS   | pE104118  | 2813-2091      | 2113-2108     | C/NC | 343 |
|     |                   | AS   | AS   | pE101129  | 2802-2091      | 2113-2108     | C/NC | 344 |
|     |                   | AS   | AS   | L-10-3-4  | 2745-2091      | 2113-2108     | C/NC | 345 |
|     |                   | AS   | AS   | L-10-1-9  | 2581-2091      | 2113-2108     | C/NC | 346 |
|     |                   | AS   | AS   | pE1012112 | 2454-2091      | 2113-2108     | C/NC | 347 |
| 139 | RL3 (S), RL4 (AS) | S    | S    | pE104119  | 2428-3361      |               | NC   | 348 |
|     |                   | S/AS | S/AS | pE103210  | 2837-3864      |               | NC   | 349 |
|     |                   | S/AS | S/AS | pE1012213 | 2837-3867      |               | NC   | 350 |
|     |                   | S/AS | S/AS | pE101032  | 2946-4018      |               | NC   | 351 |
|     |                   | S/AS | S/AS | pL328     | 187286-186763  |               | NC   | 352 |
|     |                   | S    | S    | pE1211    | 3116-3701      |               | NC   | 353 |
|     |                   | S    | S    | pE1012129 | 3116-3704      |               | NC   | 354 |
| 140 | RL4 (S), RL3 (AS) | S/AS | S/AS | pE101350  | 186279-187299  |               | NC   | 355 |
|     |                   | S/AS | S/AS | pL344     | 186316-187392  |               | NC   | 356 |
|     |                   | S/AS | S/AS | pE10222   | 4073-3099      |               | NC   | 357 |
|     |                   | S/AS | S/AS | E-8-2-5   | 4034-2968      |               | NC   | 358 |
|     |                   | S/AS | S/AS | pL6314    | 3993-3052      |               | NC   | 359 |

|     |                             |      |      |           |                          |            |      |     |
|-----|-----------------------------|------|------|-----------|--------------------------|------------|------|-----|
|     |                             | S/AS | S/AS | pE101121  | 3953-2943                |            | NC   | 360 |
|     |                             | S/AS | S/AS | pL348     | 3976-2838                |            | NC   | 361 |
|     |                             | S/AS | S/AS | pL828     | 186481-187467            |            | NC   | 362 |
|     |                             | S/AS | S/AS | pE10414   | 186494-187476            |            | NC   | 363 |
|     |                             | S/AS | S/AS | pL446     | 186546-187478            |            | NC   | 364 |
|     |                             | S/AS | S/AS | pE104116  | 3852-2825*               | Genomic pA | NC   | 365 |
|     |                             | S/AS | S/AS | pE1033318 | 3847-2825*               | Genomic pA | NC   | 366 |
|     |                             | S/AS | S/AS | pE1012220 | 3847-3088                |            | NC   | 367 |
| 141 | RL3 (AS)                    | AS   | AS   | pL827     | 3697-2817*               | Genomic pA | C/NC | 368 |
|     |                             | AS   | AS   | pL448     | 186714-187680            |            | C/NC | 369 |
|     |                             | AS   | AS   | L-10-1-5  | 3673-2842                |            | C/NC | 370 |
|     |                             | AS   | AS   | pE1011211 | 3654-2535                |            | C/NC | 371 |
|     |                             | AS   | AS   | pE10336   | 186760-187892            |            | C/NC | 372 |
|     |                             | AS   | AS   | L-10-4-3  | 3624-2600                |            | C/NC | 373 |
|     |                             | AS   | AS   | pE1012150 | 3601-2528                |            | C/NC | 374 |
|     |                             | AS   | AS   | pE10331   | 186818-187875            |            | C/NC | 375 |
| 142 | RL3 (AS)                    | AS   | AS   | pE10224   | 3535-2454                |            | C/NC | 376 |
|     |                             | AS   | AS   | L-10-4-14 | 3518-2455                |            | C/NC | 377 |
|     |                             | AS   | AS   | pE101221  | 3486-2422                |            | C/NC | 378 |
|     |                             | AS   | AS   | L-10-3-2  | 3469-2357                |            | C/NC | 379 |
|     |                             | AS   | AS   | pE10136   | 186952-188037            |            | C/NC | 380 |
|     |                             | AS   | AS   | pE10122   | 186992-188039            |            | C/NC | 381 |
|     |                             | AS   | AS   | pL213     | 3330-2437*               | Genomic pA | C/NC | 382 |
|     |                             | AS   | AS   | pL445     | 3401-2457                |            | C/NC | 383 |
| 143 | RL3 (AS)                    | AS   | AS   | L-10-4-11 | 3373-2817*               | Genomic pA | C/NC | 384 |
| 144 | RL4 (S), RL3 (AS)           | S/AS | S/AS | pE10319   | 3847-3304 + 3247-2817*   | Genomic pA | C/NC | 385 |
| 145 | RL4 (S), RL3 (AS)           | S/AS | S/AS | pE102212  | 3935-3908 + 3614-3200    |            | C/NC | 386 |
| 146 | RL3 (AS)                    | AS   | AS   | pL245     | 187185-187981            |            | C/NC | 387 |
| 147 | RL5 (AS), TRL4 (S)          | AS/S | AS/S | pE109511  | 4950-3947                |            | NC   | 388 |
|     |                             | AS/S | AS/S | pE10218   | 4727-3710                |            | NC   | 389 |
|     |                             | AS/S | AS/S | pL559     | 4585-3615                |            | NC   | 390 |
| 148 | RL5 (AS), RL4 (S), RL3 (AS) | AS/S | AS/S | pE103121  | 4558-3481 --- 3724-2817* | Genomic pA | NC   | 391 |
|     |                             | AS/S | AS/S | pE10326   | 4558-3506 --- 4026-3200* | Genomic pA | NC   | 392 |
|     |                             | AS/S | AS/S | pE101112  | 4564-3521                |            | NC   | 393 |

|      |      |           |               |    |     |
|------|------|-----------|---------------|----|-----|
| AS/S | AS/S | pE10323   | 4562-3521     | NC | 394 |
| AS/S | AS/S | pE101036  | 4562-3521     | NC | 395 |
| AS/S | AS/S | pE10125   | 185836-186921 | NC | 396 |
| AS/S | AS/S | pE101370  | 4562-3521     | NC | 397 |
| AS/S | AS/S | pE1012114 | 185836-186918 | NC | 398 |
| AS/S | AS/S | L-8-10-4  | 185836-186921 | NC | 399 |
| AS/S | AS/S | pL522     | 185836-186917 | NC | 400 |
| AS/S | AS/S | pL554     | 4562-3595     | NC | 401 |
| AS/S | AS/S | pL558     | 4562-3649     | NC | 402 |
| AS/S | AS/S | pL5311    | 4562-3521     | NC | 403 |
| AS/S | AS/S | pL646     | 185837-186735 | NC | 404 |
| AS/S | AS/S | pE103220  | 4560-3495     | NC | 405 |
| AS/S | AS/S | pE103224  | 4560-3539     | NC | 406 |
| AS/S | AS/S | pE103111  | 4559-3533     | NC | 407 |
| AS/S | AS/S | pE103212  | 4559-3533     | NC | 408 |
| AS/S | AS/S | pL538     | 4559-3521     | NC | 409 |
| AS/S | AS/S | pE10126   | 185839-186920 | NC | 410 |
| AS/S | AS/S | pE103223  | 185839-186892 | NC | 411 |
| AS/S | AS/S | pE103219  | 4559-3521     | NC | 412 |
| AS/S | AS/S | pL1031    | 4559-3628     | NC | 413 |
| AS/S | AS/S | L-10-2-6  | 185839-186921 | NC | 414 |
| AS/S | AS/S | pL1028    | 185839-186887 | NC | 415 |
| AS/S | AS/S | pE101210  | 4558-3478     | NC | 416 |
| AS/S | AS/S | pE10211   | 4558-3521     | NC | 417 |
| AS/S | AS/S | pE103222  | 4558-3521     | NC | 418 |
| AS/S | AS/S | pE1011117 | 185840-186867 | NC | 419 |
| AS/S | AS/S | pE101227  | 185840-186917 | NC | 420 |
| AS/S | AS/S | pL1022    | 4558-3506     | NC | 421 |
| AS/S | AS/S | pE10316   | 185840-186918 | NC | 422 |
| AS/S | AS/S | pE10139   | 185840-186921 | NC | 423 |
| AS/S | AS/S | pE101315  | 4558-3521     | NC | 424 |
| AS/S | AS/S | pE101311  | 185858-186904 | NC | 425 |
| AS/S | AS/S | L-7-8-1-8 | 4558-3529     | NC | 426 |
| AS/S | AS/S | L-10-2-2  | 185840-186892 | NC | 427 |

|      |      |           |                |            |    |     |
|------|------|-----------|----------------|------------|----|-----|
| AS/S | AS/S | L-10-1-11 | 4558-3521      |            | NC | 428 |
| AS/S | AS/S | pL813     | 4558-3649      |            | NC | 429 |
| AS/S | AS/S | pL4113    | 4558-3614      |            | NC | 430 |
| AS/S | AS/S | pL1014    | 4558-3471      |            | NC | 431 |
| AS/S | AS/S | pL614     | 4558-3611      |            | NC | 432 |
| AS/S | AS/S | pL1046    | 4558-3649      |            | NC | 433 |
| AS/S | AS/S | pL648     | 4558-3649      |            | NC | 434 |
| AS/S | AS/S | pL10411   | 4558-3649      |            | NC | 435 |
| AS/S | AS/S | pL329     | 4558-3611      |            | NC | 436 |
| AS/S | AS/S | pL1025    | 4558-3506      |            | NC | 437 |
| AS/S | AS/S | pL1017    | 185840-186920  |            | NC | 438 |
| AS/S | AS/S | pL6317    | 185840-186818  |            | NC | 439 |
| AS/S | AS/S | pE101212  | 4557-3611      |            | NC | 440 |
| AS/S | AS/S | pE103211  | 4559-3613      |            | NC | 441 |
| AS/S | AS/S | pE10223   | 185841-186919  |            | NC | 442 |
| AS/S | AS/S | L-7-8-1-1 | 185841-186906  |            | NC | 443 |
| AS/S | AS/S | pE101113  | 155842-186920  |            | NC | 444 |
| AS/S | AS/S | pL341     | 4556-3521      |            | NC | 445 |
| AS/S | AS/S | pE1011114 | 185842-186920* | Genomic pA | NC | 446 |
| AS/S | AS/S | pL323     | 185842-186918  |            | NC | 447 |
| AS/S | AS/S | pE1011213 | 4556-3521      |            | NC | 448 |
| AS/S | AS/S | pL1033    | 4555-3506      |            | NC | 449 |
| AS/S | AS/S | L-8-1-6   | 4555-3521      |            | NC | 450 |
| AS/S | AS/S | pE10311   | 4554-3533      |            | NC | 451 |
| AS/S | AS/S | pE101223  | 185844-186921  |            | NC | 452 |
| AS/S | AS/S | L-7-8-1-9 | 4554-3513      |            | NC | 453 |
| AS/S | As/S | pE1011112 | 185844-186918  |            | NC | 454 |
| AS/S | AS/S | pL611     | 4553-3611      |            | NC | 455 |
| AS/S | AS/S | L-10-4-19 | 4552-4014      |            | NC | 456 |
| AS/S | AS/S | pE1012217 | 4551-3719      |            | NC | 457 |
| AS/S | AS/S | L-10-1-12 | 4551-3602      |            | NC | 458 |
| AS/S | AS/S | L-10-1-2  | 185848-186917  |            | NC | 459 |
| AS/S | AS/S | pE10413   | 4550-3521      |            | NC | 460 |
| AS/S | AS/S | pE10322   | 4549-3521      |            | NC | 461 |



|      |      |           |                |            |    |     |
|------|------|-----------|----------------|------------|----|-----|
| AS/S | AS/S | pE103221  | 4549-3521      |            | NC | 462 |
| AS/S | AS/S | pE10315   | 4549-3521      |            | NC | 463 |
| AS/S | AS/S | pE10318   | 4549-3521      |            | NC | 464 |
| AS/S | AS/S | pE10421   | 4549-3521      |            | NC | 465 |
| AS/S | AS/S | pE101119  | 4549-3521      |            | NC | 466 |
| AS/S | AS/S | pE103117  | 4549-3533      |            | NC | 467 |
| AS/S | AS/S | pE10217   | 185849-186937  |            | NC | 468 |
| AS/S | AS/S | pE103317  | 185849-186903  |            | NC | 469 |
| AS/S | AS/S | pE10328   | 4549-3521      |            | NC | 470 |
| AS/S | AS/S | pE1011214 | 4549-3481      |            | NC | 471 |
| AS/S | AS/S | pE104213  | 4549-3521      |            | NC | 472 |
| AS/S | AS/S | pE103320  | 185849-186917  |            | NC | 473 |
| AS/S | AS/S | L-10-1-1  | 185849-186892  |            | NC | 474 |
| AS/S | AS/S | L-10-4-4  | 4549-3506      |            | NC | 475 |
| AS/S | AS/S | L-7-8-1-2 | 4549-3500      |            | NC | 476 |
| AS/S | AS/S | L-10-4-7  | 185849-186919* | Genomic pA | NC | 477 |
| AS/S | AS/S | pL7212    | 4549-3611      |            | NC | 478 |
| AS/S | AS/S | pL637     | 4549-3611      |            | NC | 479 |
| AS/S | AS/S | pL815     | 4549-3611      |            | NC | 480 |
| AS/S | AS/S | pL7410    | 4549-3650      |            | NC | 481 |
| AS/S | AS/S | pL311     | 185849-186919  |            | NC | 482 |
| AS/S | AS/S | pL513     | 185849-186931  |            | NC | 483 |
| AS/S | AS/S | pL938     | 4549-3506      |            | NC | 484 |
| AS/S | AS/S | L-10-4-12 | 4549-3454      |            | NC | 485 |
| AS/S | AS/S | pL746     | 185850-186761  |            | NC | 486 |
| AS/S | AS/S | pL251     | 185850-186787  |            | NC | 487 |
| AS/S | AS/S | pL10312   | 4548-3626      |            | NC | 488 |
| AS/S | AS/S | pE103119  | 4548-3521      |            | NC | 489 |
| AS/S | AS/S | pE103313  | 4548-3467      |            | NC | 490 |
| AS/S | AS/S | pE10215   | 4548-3469      |            | NC | 491 |
| AS/S | AS/S | pE1012121 | 4548-3448      |            | NC | 492 |
| AS/S | AS/S | pE1012122 | 185850-186948  |            | NC | 493 |
| AS/S | AS/S | pE1012210 | 185850-186917  |            | NC | 494 |
| AS/S | AS/S | L-7-8-1-6 | 186860-185850  |            | NC | 495 |

|      |      |           |                           |            |    |     |
|------|------|-----------|---------------------------|------------|----|-----|
| AS/S | AS/S | pE1012212 | 185851-186946             |            | NC | 496 |
| AS/S | AS/S | pE10128   | 4547-3447                 |            | NC | 497 |
| AS/S | AS/S | pL5213    | 185851-186930             |            | NC | 498 |
| AS/S | AS/S | pE1012219 | 4547-3474                 |            | NC | 499 |
| AS/S | AS/S | pE10313   | 4547-3474                 |            | NC | 500 |
| AS/S | AS/S | pE10317   | 4547-3506                 |            | NC | 501 |
| AS/S | AS/S | pE10412   | 185851-186917             |            | NC | 502 |
| AS/S | AS/S | pL1038    | 4547-3626                 |            | NC | 503 |
| AS/S | AS/S | pE10334   | 4546-3506                 |            | NC | 504 |
| AS/S | AS/S | pE103214  | 4546-3539                 |            | NC | 505 |
| AS/S | AS/S | pE10212   | 4546-3451                 |            | NC | 506 |
| AS/S | AS/S | pE101229  | 4546-3451                 |            | NC | 507 |
| AS/S | AS/S | pE101115  | 185852-186947             |            | NC | 508 |
| AS/S | AS/S | pL214     | 4546-3614                 |            | NC | 509 |
| AS/S | AS/S | pL1023    | 185852-186948             |            | NC | 510 |
| AS/S | AS/S | pE101211  | 4537-3449 --- 3254-2118** |            | NC | 511 |
| AS/S | AS/S | pE103316  | 185862-186966             |            | NC | 512 |
| AS/S | AS/S | pE103311  | 185863-186949             |            | NC | 513 |
| AS/S | AS/S | pL442     | 4532-3608                 |            | NC | 514 |
| AS/S | AS/S | pE10137   | 185871-186941             |            | NC | 515 |
| AS/S | AS/S | pE101225  | 4527-3452                 |            | NC | 516 |
| AS/S | AS/S | pL2411    | 4526-3611                 |            | NC | 517 |
| AS/S | AS/S | pE10327   | 4526-3450                 |            | NC | 518 |
| AS/S | AS/S | pE103216  | 4526-3521                 |            | NC | 519 |
| AS/S | AS/S | pL242     | 4526-3598                 |            | NC | 520 |
| AS/S | AS/S | pE102210  | 185872-186921             |            | NC | 521 |
| AS/S | AS/S | pE102215  | 185872-186948             |            | NC | 522 |
| AS/S | AS/S | pL535     | 185873-186919*            | Genomic pA | NC | 523 |
| AS/S | AS/S | pL3310    | 185873-186927             |            | NC | 524 |
| AS/S | AS/S | pE101034  | 4524-3706                 |            | NC | 525 |
| AS/S | AS/S | pE1011118 | 4511-3616                 |            | NC | 526 |
| AS/S | AS/S | pE10426   | 4511-3724                 |            | NC | 527 |
| AS/S | AS/S | pE104113  | 4548-3874                 |            | NC | 528 |
| AS/S | AS/S | pE1012116 | 185888-186967             |            | NC | 529 |

|     |                                                  |      |      |           |                                |               |    |     |
|-----|--------------------------------------------------|------|------|-----------|--------------------------------|---------------|----|-----|
|     |                                                  | AS/S | AS/S | pE10228   | 4493-3432                      |               | NC | 530 |
|     |                                                  | AS/S | AS/S | pL3210    | 4513-4256                      |               | NC | 531 |
| 149 | RL4 (S), RL3 (AS)                                | S/AS | S/AS | pL441     | 4141-3199                      |               | NC | 532 |
|     |                                                  | S/AS | S/AS | L-8-1-3   | 186278-187244                  |               | NC | 533 |
|     |                                                  | S/AS | S/AS | pE1011215 | 3849-3205*                     | Genomic pA    | NC | 534 |
| 150 | RL3 (AS)                                         | AS   | AS   | E-9-1-3   | 3774-2817*                     | Genomic pA    | NC | 535 |
|     |                                                  | AS   | AS   | E-8-2-6   | 3707-2842*                     | Genomic pA    | NC | 536 |
|     |                                                  | AS   | AS   | E-8-2-2   | 3621-2566                      |               | NC | 537 |
| 151 | RL5 (AS), RL4 (S)                                | AS/S | AS/S | pL519     | 4549-3939*                     | Genomic pA    | NC | 538 |
|     |                                                  | AS/S | AS/S | pL825     | 4548-3939*                     | Genomic pA    | NC | 539 |
|     |                                                  | AS/S | AS/S | pE103312  | 4546-3948*                     | Genomic pA    | NC | 540 |
|     |                                                  | AS/S | AS/S | pL7111    | 4552-4234                      |               | NC | 541 |
|     |                                                  | AS/S | AS/S | pE1012119 | 4556-4365                      |               | NC | 542 |
| 152 | RL4 (S), RL3 (AS)                                | S/AS | S/AS | pE102218  | 4037-3479*                     | Genomic pA    | NC | 543 |
| 153 | RL5 (AS), RL4 (S), RL3 (AS)                      | AS/S | AS/S | pE10325   | 4550-4474 + 4313-3304          |               | NC | 544 |
| 154 | RL8 (AS), RL7 (S)                                | AS/S | AS/S | pL417     | 7357-6340*                     | 6365-6360     | NC | 545 |
|     |                                                  | AS/S | AS/S | pL227     | 7356-6340*                     | 6365-6360     | NC | 546 |
|     |                                                  | AS/S | AS/S | L-8-10-5  | 7351-6340*                     | 6365-6360     | NC | 547 |
|     |                                                  | AS/S | AS/S | L-10-4-17 | 183048-184060*                 | 184033-184038 | NC | 548 |
|     |                                                  | AS/S | AS/S | pIE823    | 7346-6340*                     | 6365-6360     | NC | 549 |
|     |                                                  | AS/S | AS/S | L-10-3-6  | 7331-6340*                     | 6365-6360     | NC | 550 |
|     |                                                  | AS/S | AS/S | L-10-4-8  | 183067-184060*                 | 184033-184038 | NC | 551 |
|     |                                                  | AS/S | AS/S | L-10-1-13 | 183067-184060*                 | 184033-184038 | NC | 552 |
|     |                                                  | AS/S | AS/S | L-10-1-6  | 183069-184060*                 | 184033-184038 | NC | 553 |
|     |                                                  | AS/S | AS/S | L-10-4-5  | 183085-184060*                 | 184033-184038 | NC | 554 |
|     |                                                  | AS/S | AS/S | pL717     | 183067-184060*                 | 184033-184038 | NC | 555 |
|     |                                                  | AS/S | AS/S | pL1711    | 7351-6340*                     | 6365-6360     | NC | 556 |
| 155 | RL7 (S)                                          | S    | S    | pL255     | 7139-6340*                     | 6365-6360     | NC | 557 |
| 156 | RL11(AS), RL10 (AS), RL9 (AS), RL8 (AS), RL7 (S) | AS/S | AS/S | L-8-1-5   | 181290-181998 + 182621-184060* | 184033-184038 | C  | 558 |
| 157 | RL11 (AS), RL9 (AS), RL8 (AS), RL7 (S)           | AS/S | AS/S | pL811     | 181111-181273 + 182621-184060* | 184033-184038 | C  | 559 |
| 158 | RL9 (AS), RL8 (AS), RL7 (S)                      | AS/S | AS/S | pE101213  | 182416-184060*                 | 184033-184038 | NC | 560 |
| 159 | RL13 (S), RL14 (S), UL1                          | S    | S    | L-7-8-1-4 | 10745-11825                    |               | C  | 561 |

(S)

|     |                             |      |    |           |                                  |               |      |     |
|-----|-----------------------------|------|----|-----------|----------------------------------|---------------|------|-----|
| 160 | TRS1 (AS), J1S (AS)         | AS   | AS | pL645     | 228454-229856*                   | 229826-229831 | C/NC | 562 |
| 161 | IRS1 (S), US1 (AS)          | S/AS | S  | pE1012117 | 192755-194003*                   | 193969-193974 | C    | 563 |
|     |                             | S/AS | S  | pE101316  | 192761-194003*                   | 193969-193974 | C    | 564 |
|     |                             | S/AS | S  | pIE934    | 192789-194003*                   | 193969-193974 | C    | 565 |
| 162 | TRS1(S)                     | S    | S  | pL317     | 229476-228581 --- 227890-227028* | 227044-227039 | C    | 566 |
| 163 | US3 (S)                     | S    | S  | IE10-1-4  | 195645-194820*                   | 194845-194840 | C    | 567 |
|     |                             | S    | S  | pIE534    | 195645-194820*                   | 194845-194840 | C    | 568 |
| 164 | US3 (S)                     | S    | S  | pIE536    | 195446-194820*                   | 194845-194840 | C    | 569 |
| 165 | US3 (S)                     | S    | S  | pIE931    | 195646-195226 + 195057-194820*   | 194845-194840 | C    | 570 |
|     |                             | S    | S  | pIE1013   | 195635-195226 + 195057-194820*   | 194845-194840 | C    | 571 |
| 166 | US6 (S), US5 (AS), US4 (AS) | S/AS | S  | pL178     | 196983-195968                    |               | C    | 572 |
|     |                             | S/AS | S  | pL172     | 196983-195886                    |               | C    | 573 |
| 167 | US9 (S), US8 (S)            | S    | S  | pE101116  | 199663-198596                    |               | C    | 574 |
|     |                             | S    | S  | pE1012216 | 199426-198383                    |               | C    | 575 |
|     |                             | S    | S  | pL612     | 199384-198451                    |               | C    | 576 |
| 168 | US11 (S), US10 (S)          | S    | S  | pE101215  | 201289-200203                    |               | C    | 577 |
| 169 | US15 (S), US14 (S)          | S    | S  | pE10427   | 205024-203901                    |               | C    | 578 |
| 170 | US15 (S), US14 (S)          | S    | S  | pL1032    | 204501-203393                    |               | C    | 579 |
|     |                             | S    | S  | pL7411    | 204326-203392                    |               | C    | 580 |
|     |                             | S    | S  | pL752     | 204326-203329                    |               | C    | 581 |
| 171 | US13 (S), US12 (S)          | S    | S  | pIE833    | 203238-202319                    |               | C    | 582 |
|     |                             | S    | S  | pE10329   | 203273-202302                    |               | C    | 583 |
|     |                             | S    | S  | pL7112    | 203614-202645                    |               | C    | 584 |
| 172 | US18 (S)                    | S    | S  | pL10-4-18 | 208136-207145*                   | 207165-207160 | C    | 585 |
|     |                             | S    | S  | pL516     | 208088-207145*                   | 207165-207160 | C    | 586 |
| 173 | US20 (S), US19 (S)          | S    | S  | pE1011212 | 209579-208536                    |               | C    | 587 |
|     |                             | S    | S  | pE10132   | 209535-208789                    |               | C    | 588 |
|     |                             | S    | S  | pE103217  | 209378-208325                    |               | C    | 589 |
| 174 | US22 (S)                    | S    | S  | pIE717    | 212547-211605                    |               | C    | 590 |
|     |                             | S    | S  | pL831     | 212141-211164                    |               | C    | 591 |
| 175 | US24 (S), US23 (S)          | S    | S  | pL412     | 214807-213872                    |               | C    | 592 |

|     |                                           |      |      |           |                                                  |               |      |     |
|-----|-------------------------------------------|------|------|-----------|--------------------------------------------------|---------------|------|-----|
| 176 | US27 (S)                                  | S    | S    | pL415     | 218550-218727 + 218803-219559                    |               | C    | 593 |
| 177 | US28 (S)                                  | S    | S    | pL1011113 | 220061-221229*                                   | 221195-221200 | C    | 594 |
|     |                                           | S    | S    | pE1012113 | 220092-221229*                                   | 221195-221200 | C    | 595 |
| 178 | US28 (S), US33 (AS), US34 (S)             | S/AS | S/AS | pE101035  | 220092-220455 + 225128-226226*                   | 226202-226207 | C    | 596 |
| 179 | US30 (AS), US29 (AS)                      | AS   | AS   | L-824     | 223323-222411                                    |               | C/NC | 597 |
| 180 | US31 (AS), US30 (AS), US29 (AS)           | AS   | AS   | pE103112  | 224212-222419 + 222328-222143*                   | 222164-222159 | C/NC | 598 |
| 181 | US32 (S), US33 (AS)                       | S/AS | S/AS | pL719     | 224275-225251                                    |               | C    | 599 |
| 182 | US33 (S), US32 (AS), US29 (AS)            | S/AS | S/AS | pL521     | 225350-224414 + 222458-222421 --- 222253-221298* | 221317-221312 | NC   | 600 |
| 183 | US33 (AS), US34 (S), US34A (S), US35 (AS) | AS/S | AS/S | pE1032118 | 225066-226136                                    |               | C    | 601 |
|     |                                           | AS/S | AS/S | pIE713    | 225053-225981                                    |               | C    | 602 |
| 184 | US34 (S), US34A (S), US35 (AS)            | S/AS | S    | pIE624    | 225418-226226*                                   | 226202-226207 | C    | 603 |
|     |                                           | S/AS | S    | pIE229    | 225422-226212*                                   | 226202-226207 | C    | 604 |

<sup>1</sup>AS clones for which no S counterpart was found in this study or in the literature were revised as being in the S orientation.

<sup>2</sup>Relative to Genbank Accession NC\_001347. A plus sign indicates presumptive splicing. Multiple dashes indicate that sequence runs from the 5' and 3' ends did not overlap. All clones were subjected to sequencing from the 5' end of the clone and a subset were subjected to sequencing from 3' end of the clone. An asterisk indicates that the 3' end of the clone was sequenced. For this set, the position of the presumptive polyadenylation signal is given. Note that in some cases, first strand cDNA synthesis likely initiated from a genomically-encoded poly (A) tract (genomic pA). For some clones, we were unable to sequence through the poly (A) tract of the cDNA clone. In these cases (indicated by two asterices), a poly (T) sequencing primer was utilized but this precluded resolution of the sequence of the poly (A) tract and the polyadenylation signal. Note that the precise 3' ends of clones without asterices have not yet been determined. 5' RACE was performed on a subset of clones to resolve the precise 5' ends which are indicated in parentheses.

<sup>3</sup>Tentative Coding (C) and noncoding (NC) predictions were made as follows: If clones largely or completely overlap one or more annotated genes in the S orientation, the C-NC designations described at the Los Alamos Oral Pathogens Sequences Databases were used. For AS clones, a C designation was limited to clones with ORFs over 100AA that begin with an ATG start codon. If a more liberal C definition is applied (70 AA ORF, any start codon), then most AS clones may also be classified as coding. These are listed as C/NC in this table indicating they are probable noncoding transcripts. In the absence of data verifying these predictions, these C/NC designations should be considered provisional.
