# Supplementary material
Source: PubMed Central journal article supplement (PMC2045512)
Supplement: jvirol_81_20_11267__2.pdf [file jvirol_81_20_11267__2.pdf]

Supplemental Table 2.

cDNA Clones Organized by Gene Name, Other Transcript Mapping Studies, and Comparison of Temporal Class Assignment to Earlier Northern and Microarray Studies.

| Viral Gene and/or Name(s) | Overlapping Clones (orientation) <sup>1</sup>                                                                                                                                                                                                                                                                                 | Reference and strain for other mapping data of sense transcripts | Reference and strain for other mapping data of antisense transcripts | Library in which clone(s) were isolated in this study | Temporal class assigned by microarray analysis (11) | Temporal class assigned by other northern analyses <sup>2</sup> |
|---------------------------|-------------------------------------------------------------------------------------------------------------------------------------------------------------------------------------------------------------------------------------------------------------------------------------------------------------------------------|------------------------------------------------------------------|----------------------------------------------------------------------|-------------------------------------------------------|-----------------------------------------------------|-----------------------------------------------------------------|
| J1L                       | NR                                                                                                                                                                                                                                                                                                                            |                                                                  |                                                                      |                                                       | E                                                   |                                                                 |
| TRL1-TRL14                | (See TRL/IRL region below)                                                                                                                                                                                                                                                                                                    |                                                                  |                                                                      |                                                       |                                                     |                                                                 |
| RL5A                      | NR                                                                                                                                                                                                                                                                                                                            | (17) AD169                                                       |                                                                      | E, L                                                  |                                                     | L (17)                                                          |
| UL1                       | L-8-1-1 (S), pL321 (S), pL249 (S), pE10226 (S), L-7-8-1-1 (S)                                                                                                                                                                                                                                                                 |                                                                  |                                                                      | E, L                                                  | E-L                                                 |                                                                 |
| UL2                       | pL321 (AS), pL249 (AS), pE10226 (AS)                                                                                                                                                                                                                                                                                          |                                                                  |                                                                      | E, L                                                  | L                                                   |                                                                 |
| UL3                       | (All in AS orientation) pL321, pL249, pE10226, pL932, pL749, L-8-10-3, pL744, pL5112, pL444, pL8211, pL724, L-10-4-13, L-7-8-1-7, L-8-1-2, pL5310, L-10-2-3, pL5316, pL5313, pE10134, pE102214, pL1036, pE101037, pE101117, pL10310, pLE631, pE101222, pE102213, pE1012111, pE1011111, pE10428, pL10-3-3, pLE631              |                                                                  |                                                                      | L, E, IE                                              | L                                                   |                                                                 |
| UL4                       | (All in S orientation) pL321, pL249, pE10226, pL932, pL749, L-8-10-3, pL744, pL5112, pL444, pL8211, pL724, L-10-4-13, L-7-8-1-7, L-8-1-2, pL5310, L-10-2-3, pL5316, pL5313, pE10134, pE102214, pL1036, pE101037, pE101117, pL10310, pLE631, pE101222, pE102213, pE1012111, pE1011111, pE10428, pL10-3-3, pLE631, pL631, pL316 | (12) Towne                                                       |                                                                      | L, E, IE                                              | E                                                   |                                                                 |
| UL5                       | (All in S orientation) pL749, L-8-10-3, pL744, pL5112, pL444, pL8211, pL724, L-10-4-13, L-7-8-1-7, L-8-1-2, pL5310, L-10-2-3, pL5316, pL5313, pE10134, pE102214, pL1036, pE101037, pE101117, pL10310, pLE631, pE101222, pE102213, pE1012111, pE1011111, pE10428, pL10-3-3, pL631, pL316, L-10-2-5, pE103122                   |                                                                  |                                                                      | L, E, IE                                              | E                                                   |                                                                 |
| UL6                       | (All in S orientation) pE101222, pE102213, pE1012111, pE1011111, pE10428, pL10-3-3, pL631, pL316, L-10-2-5, pE103122                                                                                                                                                                                                          |                                                                  |                                                                      | L, E, IE                                              |                                                     |                                                                 |
| UL7                       | NR                                                                                                                                                                                                                                                                                                                            |                                                                  |                                                                      |                                                       | L                                                   |                                                                 |

|              |                                                                                         |                          |                                                             |          |            |
|--------------|-----------------------------------------------------------------------------------------|--------------------------|-------------------------------------------------------------|----------|------------|
| UL8          | NR                                                                                      |                          |                                                             |          |            |
| UL9          | NR                                                                                      |                          |                                                             |          | L          |
| UL10         | NR                                                                                      |                          |                                                             |          |            |
| UL11         | pE102216 (AS)                                                                           |                          |                                                             | E        |            |
| UL13         | pL1016 (S), pL716 (S), pE102216 (AS), pIE816 (S), pL1042 (S), pL1037 (S), pIE5311 (S)   |                          |                                                             | IE, E, L | E          |
| UL12         | pL1016 (AS), pL716 (AS), pE102216 (S)                                                   |                          |                                                             | E, L     |            |
| UL14         | pE104210 (S)                                                                            |                          |                                                             | E        | L          |
| UL16         | pIE227 (S)                                                                              | (27) AD169               | (27) AD169<br>(evidence for AS transcript overlapping UL16) | IE       | E, L (27)  |
| UL15A        | NR                                                                                      | (11) Towne               |                                                             |          | L L (11)   |
| UL17         | pIE227 (S)                                                                              |                          |                                                             | IE       | E          |
| UL18         | NR                                                                                      |                          |                                                             |          | L          |
| UL19         | E-9-1-4 (S), pL636 (S)                                                                  |                          |                                                             | E        |            |
| UL20         | E-9-1-4 (S), pL636 (S), pIE612 (S), pIE789 (S), pIE1031 (S), IE8-7-1-1(S), pIE9-2-1 (S) |                          |                                                             | IE, E, L |            |
| UL21A        |                                                                                         | (10) AD169               |                                                             |          |            |
| UL21.5       | IE8-7-1-1 (AS), pIE9-2-1 (AS)                                                           | (50) AD169               |                                                             | IE       | L E-L (10) |
| UL22A, UL20a | IE8-7-1-1 (S), pIE9-2-1 (S) pIE526 (AS), pIE912 (AS), pIE626 (AS)                       | (55) AD169<br>(50) AD169 |                                                             | IE       | L (50)     |
| UL23         | pIE9-2-2 (S), pL7-5-1 (AS), pL5312 (S)                                                  |                          |                                                             | IE, L    |            |
| UL24         | pL3115 (AS), pL5312 (S), pL8212 (AS), pL715 (AS)                                        |                          |                                                             | L        |            |
| UL25         | pL3115 (S), pL8212 (S), pL241(S), pL757 (S), pL6414 (S), pL10311 (S), pIE811 (AS)       | (5) AD169                |                                                             | L, IE    | L (5)      |
| UL26         | pE104117 (S)                                                                            | (59) AD169               |                                                             | E        | E E-L (59) |
| UL27         | pE104117 (S), pL551 (AS)                                                                |                          |                                                             | E, L     | E          |
| UL28         | pL551 (AS)                                                                              |                          |                                                             | L        | L          |
| UL29         | pL551 (AS), pIE526 (S), pIE912 (S), pIE626 (S)                                          |                          |                                                             | IE, L    | L          |

|        |                                                                                                                           |                                                              |          |     |            |
|--------|---------------------------------------------------------------------------------------------------------------------------|--------------------------------------------------------------|----------|-----|------------|
| UL30   | pL551 (AS)                                                                                                                |                                                              | L        |     |            |
| UL31   | NR                                                                                                                        | (11) Towne                                                   |          | L   | L (11)     |
| UL32   | pL2510 (S), pL326 (S), pL246 (S), pL235 (S), pL1013 (S), pL1048 (S)                                                       | (25) AD169                                                   | L        | L   |            |
| UL33   | pL3212 (S), pL325 (S), pL2515 (S)                                                                                         | (71) AD169                                                   | L        | E   | L (71)     |
| UL34   | (All in S orientation) pIE5212, pIE625, pIE223, pIE224, pIE618, pIE336, pIE523, pL639, pL6212, pIE1034, pL6211            | (71) AD169                                                   | IE, L    | E-L | L (71)     |
| UL35   | pL533 (S), pL6410 (S)                                                                                                     | (39) Towne                                                   | L        | E   | L (39)     |
| UL35A  | pL3214 (S), pL533 (S)                                                                                                     | (39) Towne                                                   | L        |     | E (39)     |
| UL36   | pE10422 (S), IE-9-1-1 (S), pIE521 (S), pE104114 (AS)                                                                      | (32)<br>(55) AD169<br>(66) AD169<br>(67) AD169<br>(68) AD169 | IE, E    | E   | IE (66-68) |
| UL38   |                                                                                                                           | (32)<br>(66) AD169<br>(67) AD169<br>(68) AD169               |          |     | IE (66-68) |
| UL37   | pE104114 (AS), pIE324 (S), pL6313 (S), pIE788 (S),                                                                        | (67) AD169                                                   |          |     |            |
| gpUL37 | IE913 (S), pL258 (S)                                                                                                      | (68) AD169                                                   | IE, E, L |     | IE (66-68) |
| UL39   | pL5510 (AS)                                                                                                               |                                                              | L        |     |            |
| UL40   | NR                                                                                                                        | (69) AD169                                                   |          | E-L |            |
| UL41A  | pL5510 (S), pL525 (S)                                                                                                     |                                                              | L        | L   |            |
| UL42   | pL5510 (S), IE-9-10-5 (S), pIE1012 (S), pL824 (S), L-10-4-2 (S), pL525 (S)                                                |                                                              | IE, L    |     |            |
| UL43   | pL5510 (S), IE-9-10-5 (S), pIE1012 (S), pL824 (S), L-10-4-2 (S), pL5111 (S), pL812 (S), pE10419 (S), pL333 (S), pL525 (S) |                                                              | L, IE    | L   |            |
| UL44   | pL5111 (S), pL812 (S), pE10419 (S), pL216 (S), pIE325 (S), L-8-2-7 (S), L-10-3-1 (S), pL552 (S), pL525 (S)                | (19) Towne<br>(20) Towne<br>(35) Towne<br>(44)               | L, E, IE | E-L | E, L (35)  |
| UL45   | pL1044 (S)                                                                                                                |                                                              | L        |     |            |

|                              |                                                                                                                                                                                              |                                        |      |     |                |
|------------------------------|----------------------------------------------------------------------------------------------------------------------------------------------------------------------------------------------|----------------------------------------|------|-----|----------------|
| UL46                         | IE-9-10-16 (S)                                                                                                                                                                               |                                        | IE   | E-L |                |
| UL47                         | IE-9-10-16 (AS)                                                                                                                                                                              | (6) AD169                              | IE   | E-L | L (24)         |
| UL48                         | pL238 (AS), pL4410 (AS), pE1012115 (AS), pE1011210 (AS)                                                                                                                                      | (6) AD169<br>(11) Towne                | E, L | L   | L (11)         |
| UL48.5<br>UL48/UL49<br>UL48A | pL238 (S), pL4410 (S), pE1012115 (S), pE1011210 (S)                                                                                                                                          |                                        | E, L |     |                |
| UL49                         | pL238 (S), pL4410 (S), pE1012115 (S), pE1011210 (S), pL632 (S), pL723 (S), pE101125 (S)                                                                                                      |                                        | E, L | E-L |                |
| UL50                         | pE101125 (S)                                                                                                                                                                                 |                                        | E    |     |                |
| UL51                         | NR                                                                                                                                                                                           |                                        |      |     |                |
| UL52                         | pL258 (AS), pE10135 (S), pL319 (S), pL726 (S), L-10-4-1 (S), pL5210, pL327                                                                                                                   |                                        | L    | L   |                |
| UL53                         | pL319 (S), pL726 (S), L-10-4-1 (S), pL5210 (S), pL327, pL3111 (S)                                                                                                                            |                                        | L    | E   |                |
| UL54                         | NR                                                                                                                                                                                           | (22) AD169<br>(33) AD169<br>(58) AD169 | L    | E   | E (22, 33, 58) |
| UL55 gB                      | pL8210 (S), pL649 (S)                                                                                                                                                                        | (58) AD169                             | L    | E   | E-L (58)       |
| UL56                         | pL8210 (S), pL649 (S)                                                                                                                                                                        | (9) AD169<br>(58) AD169                | L    | E   | E (9, 58)      |
| UL57 ICP8<br>ssDNA BP        | NR                                                                                                                                                                                           | (29) AD169<br>(58) AD169               |      | E   | E (29, 58)     |
| UL58                         | NR                                                                                                                                                                                           |                                        |      | E   |                |
| UL59                         | NR                                                                                                                                                                                           |                                        |      | L   |                |
| UL60                         | NR                                                                                                                                                                                           |                                        |      | L   |                |
| UL61                         | pL252 (AS), pL629 (AS), pL638 (AS), pL831 (AS), pE103314 (AS), pE10335 (AS), pE109512 (AS), pL7210 (AS), pL6210 (AS), pL756 (AS), pL233 (S), pL537 (S)                                       |                                        | L, E |     |                |
| UL62                         | pL252 (AS), pL629 (AS), pL638 (AS), pL831 (AS), pE103314 (AS), pE10335 (AS), pE109512 (AS), pL7210 (AS), pL6210 (AS), pL756 (AS), pE101124 (AS), pL937 (AS), pL233 (S), pL729 (S), pL537 (S) |                                        | L, E |     |                |

|         |                                                                                                                                                                                                                                                                                                                                                          |                                        |       |     |          |
|---------|----------------------------------------------------------------------------------------------------------------------------------------------------------------------------------------------------------------------------------------------------------------------------------------------------------------------------------------------------------|----------------------------------------|-------|-----|----------|
| UL63    | pL252 (S), pL629 (S), pL638 (S), pL831 (S), pL937 (S),<br>pL5317 (S), pL6312 (S), pL524 (S), pE10338 (S),<br>pE10415 (S), pL832 (S), pL754 (S), pE103314 (S),<br>pE10335 (S), pE109512 (S), pE6210 (S), pL756 (S),<br>pE10124 (S), pL233 (AS), pL729 (AS), pL537 (AS)                                                                                    |                                        | L, E  | E   |          |
| UL64    | pL252 (AS), pL629 (AS), pL638 (AS), pL831 (AS),<br>pE103314 (AS), pE10335 (AS), pE109512 (AS), pL756<br>(AS), pE101124 (AS), pL937 (AS), pL5317 (AS),<br>pL6312 (AS), pL524 (AS), pE10338 (AS), pE10415<br>(AS), pL832 (AS), pL754 (AS), pL647 (AS), pE10953<br>(AS), pL338 (AS), pL717 (AS), pL814 (AS), pL233 (S),<br>pL5110 (S), pL729 (S), pL537 (S) |                                        | L, E  |     |          |
| UL65    | pL629 (S), pL638 (S), pL831 (S), pE103314 (S),<br>pE10335 (S), pE109512 (S), pL756 (S), pL937 (S),<br>pL5317 (S), pL6312 (S), pL524 (S), pE10338 (S),<br>pE10415 (S), pL832 (S), pL754 (S), pL647 (S),<br>pE10953 (S), pL338 (S), pL717 (S), pL814 (S), pL233<br>(AS), pL5110 (AS), pL537 (AS)                                                           | (15) Towne<br>(16) Towne<br>(55) AD169 | L, E  |     | L (16)   |
| UL66    | pL629 (AS), pL638 (AS), pL831 (AS), pE103314 (S),<br>pE10335 (S), pE109512 (S), pL756 (S), pL937 (S),<br>pL5317 (AS), pL524 (AS), pE10338 (AS), pE10415<br>(AS), pL832 (AS), pL754 (AS), pL647 (AS), pE10953,<br>pL338, pL717, pL814, L-8-1-4 (AS), pL537 (S)                                                                                            | (11) Towne                             | L, E  |     | E-L (11) |
| UL67    | pL629 (AS), pL638 (AS), pL831 (AS), pE103314 (AS),<br>pE10335 (AS), pE109512 (AS), pL756 (AS), pL937<br>(AS), pL5317 (AS), pL524 (AS), pE10338 (AS),<br>pE10415 (AS), pL832 (AS), pL754, pL647, pE10953<br>(AS), pL338 (AS), pL717 (AS), pL814 (AS), L-8-1-4<br>(AS), pL537 (S)                                                                          |                                        | L, E  | L   |          |
| UL68    | pL629 (AS), pL638 (AS), pL831 (AS), pE103314 (AS),<br>pE10335 (AS), pE109512 (AS), pL756 (AS), pL937<br>(AS), pL5317 (AS), pL524 (AS), pE10338 (AS),<br>pE10415 (AS), pL832 (AS), pL754, pL647, pE10953<br>(AS), pL338 (AS), pL717 (AS), pL814 (AS)                                                                                                      | (11) Towne<br>(19) Towne<br>(76) AD169 | L, E  | L   | L (11)   |
| UL69    | NR                                                                                                                                                                                                                                                                                                                                                       |                                        |       | E-L | E-L (76) |
| UL71    | pL5511 (S), pE226 (S), pL337 (S)                                                                                                                                                                                                                                                                                                                         |                                        | L, IE |     |          |
| UL70    | pL821 (S), pL933 (AS), pL345 (AS), pL5511 (AS)                                                                                                                                                                                                                                                                                                           |                                        | L     |     |          |
| UL72    | pL643 (S), pE104111 (AS), pL6311 (AS), L-10-1-4 (AS),<br>pL5511 (AS)                                                                                                                                                                                                                                                                                     |                                        | L     | E-L |          |
| UL73 gN | pE104111 (S), pL6311 (S), L-10-1-4 (S), pL635 (AS)                                                                                                                                                                                                                                                                                                       | (11) Towne                             | L, E  | E-L | L (11)   |

|           |                                                                                                                                                                                   |                          |                      |          |               |
|-----------|-----------------------------------------------------------------------------------------------------------------------------------------------------------------------------------|--------------------------|----------------------|----------|---------------|
| UL74 gO   | pE104111 (AS), pL6311 (AS), L-10-1-4 (AS), pL635 (S)                                                                                                                              |                          |                      | L, E     |               |
| UL75 gH   | NR                                                                                                                                                                                | (46) Towne               |                      |          | E-L           |
| UL76      | NR                                                                                                                                                                                |                          |                      |          |               |
| UL77      | pL745 (S), pL536 (S), pL1029 (S), L10-2-7(S), pL10410 (S)                                                                                                                         |                          |                      | L        | E             |
| UL78      | pL745 (S), pL536 (S), pL1029 (S), L10-2-7 (S), pL10410 (S), pE104110 (S), pIE322 (S)                                                                                              |                          |                      | L, E, IE | E             |
| UL79      | pL615 (AS), pL342 (AS)                                                                                                                                                            |                          |                      | L        |               |
| UL80 apnG | pL615 (S), pL342 (S)                                                                                                                                                              | (72) Colburn             |                      | L        |               |
| UL80.5    |                                                                                                                                                                                   |                          |                      |          |               |
| UL80a     | pL342 (S)                                                                                                                                                                         | (72) Colburn             |                      | L        |               |
| UL81      | pL826 (S), pL223 (S)                                                                                                                                                              |                          | (7) Clinical isolate | L, IE    | L             |
| UL82      | (All in S orientation) pL826, pIE527, pL223, pL234, pL225, pL244, pL555, pL226, pL711, pL959, pL6310, pL532                                                                       | (45) AD169<br>(54) AD169 | (7) Clinical isolate | L, IE    | L             |
| UL83      | (All in S orientation) pL5513, pL236, pL3114, pL826, pL556, pL721, pL715, pL4112, pL215, pL1047, pL5512, pL911, pL10110, pL211, pL816, pL2512, pL722, pL711, pL959, pL6310, pL532 | (45) AD169<br>(54) AD169 |                      | L        | L             |
| UL84      | (All in S orientation) pIE610, pL753, pL5314, pL742, pL1041, pL511, pL743, pL315, pL553                                                                                           |                          |                      | L        | E-L           |
| UL85      | pL1015 (S), pIE6110 (S)                                                                                                                                                           |                          |                      | IE, L    | E-L           |
| UL86      | NR                                                                                                                                                                                | (13, 53)<br>AD169        |                      |          | E-L<br>L (53) |
| UL87      | pL339 (AS), pL2212 (AS)                                                                                                                                                           |                          |                      | L        |               |
| UL88      | pL339 (AS), pL725 (S), pL2212 (AS)                                                                                                                                                |                          |                      | L        |               |
| UL91      | pL725 (S)                                                                                                                                                                         |                          |                      | L        | L             |
| UL90      | pL725 (S)                                                                                                                                                                         |                          |                      | L        | L             |
| UL92      | pL725 (S), pL2212 (AS)                                                                                                                                                            |                          |                      | L        | L             |
| UL93      | pL725 (S), pL331 (S)                                                                                                                                                              | (74) Towne<br>(55) AD169 |                      | L        | L             |
| UL94      | pL725 (S), pL331 (S)                                                                                                                                                              | (74) Towne<br>(75) Towne |                      | L        | L (75)        |

|                                          |                                                                                                                                                 |                                                                             |          |          |                              |
|------------------------------------------|-------------------------------------------------------------------------------------------------------------------------------------------------|-----------------------------------------------------------------------------|----------|----------|------------------------------|
| UL95                                     | pIE628 (S)                                                                                                                                      | (74) Towne                                                                  | IE       |          |                              |
| UL89                                     | pL725 (AS), pL331 (AS), pL2212 (S)                                                                                                              | (50) AD169<br>(74) Towne                                                    | L        | E-L      | E, L (50)                    |
| UL96                                     | pIE628 (S)                                                                                                                                      | (74) Towne                                                                  | IE       | E-L      |                              |
| UL97                                     | pIE628 (S), pL711 (S), pIE334 (S), pL231 (S), pIE918 (S), pIE925 (S), pL314 (S), pL346 (S)                                                      | (74) Towne                                                                  | IE, L    | E-L      |                              |
| UL98                                     | pIE628 (S), pIE334 (S), pL231 (S), pIE918 (S), pIE925 (S), pL314 (S), pL346 (S), pE103120 (S), pIE8110 (S), pE1012120 (S), pL759 (S), pL613 (S) | (1) AD169<br>(74) Towne                                                     | L, IE, E | E-L      | L (42)                       |
| UL99                                     | pIE628 (S), pE103120 (S), pIE8110 (S), pE1012120 (S), pL759 (S), pL613 (S)                                                                      | (42) Towne<br>(74) Towne<br>(1) AD169                                       | IE, E, L |          | L (42)                       |
| gM UL100                                 | L-8-2-5 (S), pE102221 (S)                                                                                                                       | (37) AD169                                                                  | E, L     | E-L      |                              |
| UL102                                    | L-8-2-5 (AS), pL1035 (S), pL2211 (S), pL222 (AS)                                                                                                | (57) AD169<br>and Towne                                                     | L        | L        | E (57)                       |
| UL103                                    | NR                                                                                                                                              |                                                                             |          | L        |                              |
| UL105                                    | NR                                                                                                                                              | (56) Towne                                                                  |          | E        | E (56)                       |
| UL104                                    | NR                                                                                                                                              |                                                                             |          | E        |                              |
| 5kb intron<br>(spans<br>UL111-<br>UL106) | pL539 (S), pL3211 (S)                                                                                                                           | (11) Towne<br>(34) AD169<br>(47) AD169<br>and Towne<br>(50) AD169           | L        |          | IE, E, L (34,<br>47), L (50) |
| UL106                                    | pL539 (S), pL3211 (S)                                                                                                                           |                                                                             | L        | E-L      |                              |
| UL107                                    | pIE8112 (AS), pL727 (AS)                                                                                                                        |                                                                             | IE, L    | L        |                              |
| UL108                                    | pIE8112 (S), pL727 (S), pIE2212 (AS)                                                                                                            |                                                                             | IE, L    | L        |                              |
| UL109                                    | pL748 (S), pL5211(S), pL322 (S), pL212 (S)                                                                                                      |                                                                             | L        | L        |                              |
| UL110                                    | pL6316 (S), pL935 (S), IE-9-1-5 (S), L-10-4-16 (S), pL748 (S), pL5211(S), pL322 (S), pL212 (S)                                                  | (11) Towne<br>(31) AD169<br>(40) Towne,<br>primate<br>strains<br>(51) Towne | L, IE    | IE, E, L | IE, L (11)                   |
| UL111A<br>cmvIL-10                       | pL2513 (S), pL539 (AS), pL3211 (AS)                                                                                                             |                                                                             | L        | E-L      |                              |

|           |                                                                                                                                                                                                                                                                                                                                                                                                                                   |                                                                                  |                                                                                                                                   |       |       |  |                                |
|-----------|-----------------------------------------------------------------------------------------------------------------------------------------------------------------------------------------------------------------------------------------------------------------------------------------------------------------------------------------------------------------------------------------------------------------------------------|----------------------------------------------------------------------------------|-----------------------------------------------------------------------------------------------------------------------------------|-------|-------|--|--------------------------------|
| UL111     | pL6316 (S), pL935 (S), IE-9-1-5 (S), L-10-4-16 (S),<br>pL2513 (AS), pIE538 (AS), pL539 (S), pL3211 (S)                                                                                                                                                                                                                                                                                                                            |                                                                                  |                                                                                                                                   | L, IE | L     |  |                                |
| UL112     | IE-9-10-13 (S), pIE1036 (S), pL6315 (S), IE-9-10-17 (S),<br>pIE638 (S), pL3211 (AS)                                                                                                                                                                                                                                                                                                                                               | (19) Towne<br>(61) AD169<br>(77) AD169                                           |                                                                                                                                   | IE, L | E     |  | E (61)                         |
| UL114 UDG | IE-10-1-2 (S), L-8-2-2 (S), pIE834 (S)                                                                                                                                                                                                                                                                                                                                                                                            | (14) AD169                                                                       |                                                                                                                                   | IE, L | E     |  |                                |
| UL115     | IE-10-1-2 (S), L-8-2-2 (S), pIE834 (S), pIE923 (S),<br>pL449 (AS), pL237 (AS)                                                                                                                                                                                                                                                                                                                                                     | (36) Towne                                                                       | (36) Authors<br>report that<br>only sense<br>UL119-115<br>transcripts<br>derived from<br>the same DNA<br>strand were<br>detected. | IE, L |       |  | IE, L (36)                     |
| UL116     | pIE834 (S), pIE923 (S), pL449 (AS), pL237 (AS)                                                                                                                                                                                                                                                                                                                                                                                    | (36) Towne                                                                       |                                                                                                                                   | IE, L | E-L   |  | IE, L (36)                     |
| UL117     | pL3211 (S), IE-9-2-1 (S)                                                                                                                                                                                                                                                                                                                                                                                                          | (36) Towne                                                                       |                                                                                                                                   | IE, L |       |  | IE, L (36)                     |
| UL119     | NR                                                                                                                                                                                                                                                                                                                                                                                                                                | (3) AD169<br>(36) Towne<br>(50) AD169                                            |                                                                                                                                   |       | E     |  | E, L (10)<br>IE, L (36)        |
| UL120     | NR                                                                                                                                                                                                                                                                                                                                                                                                                                |                                                                                  |                                                                                                                                   |       |       |  |                                |
| UL121     | NR                                                                                                                                                                                                                                                                                                                                                                                                                                |                                                                                  |                                                                                                                                   |       |       |  |                                |
| UL122     | IE-10-1-3 (S), pL718 (S), pL256 (S), pIE614 (S),<br>pIE6310 (S), pIE1015 (S)                                                                                                                                                                                                                                                                                                                                                      | (28) AD169<br>(49) AD169<br>(50) AD169<br>(60) AD169<br>(63) Towne<br>(73) AD169 |                                                                                                                                   | IE, L | IE, L |  | IE (60); L (49);<br>IE, L (50) |
| IE1 UL123 | (All in S orientation) pIE326, pIE915, pIE817, pIE5210,<br>pIE721, pIE714, pIE8111, pIE783, pIE813, pIE627,<br>pIE927, pIE818, pIE815, pIE622, IE-9-1-7, IE-9-1-13,<br>IE-9-10-15, IE-9-10-8, IE-9-1-8, IE-10-1-6, IE-9-2-9,<br>pIE814, pIE639, pIE634, pIE333, IE-9-10-4, pIE724,<br>pIE335, IE-10-1-7, IE-10-1-5, IE-9-2-8, IE-9-10-10,<br>pIE535, pIE2210, pIE613, pIE528, pIE836, pE1012215,<br>IE-9-2-5, IE-10-1-8, IE-9-2-7 | (2) AD169<br>(4) AD169<br>(49) AD169<br>(60) AD169<br>(63) Towne<br>(64) Towne   | (30) Clinical<br>isolate                                                                                                          | IE, E | IE    |  | IE (60)                        |
| UL124     | NR                                                                                                                                                                                                                                                                                                                                                                                                                                |                                                                                  |                                                                                                                                   |       | E     |  |                                |
| UL125     | NR                                                                                                                                                                                                                                                                                                                                                                                                                                |                                                                                  |                                                                                                                                   |       |       |  |                                |
| UL126     | NR                                                                                                                                                                                                                                                                                                                                                                                                                                |                                                                                  |                                                                                                                                   |       |       |  |                                |
| UL127     | NR                                                                                                                                                                                                                                                                                                                                                                                                                                | (41) Towne                                                                       | (41) Towne<br>(evidence for<br>AS upstream<br>of UL127)                                                                           |       |       |  |                                |
| UL128     | pL1045 (S), pL247 (S), pIE531 (S), pL5212 (S)                                                                                                                                                                                                                                                                                                                                                                                     | (43) Towne                                                                       |                                                                                                                                   | L, IE | E     |  | E (43)                         |



|             |                                                                                                                                                                                                                                                                                                                                                                                                            |                                                                    |       |      |           |
|-------------|------------------------------------------------------------------------------------------------------------------------------------------------------------------------------------------------------------------------------------------------------------------------------------------------------------------------------------------------------------------------------------------------------------|--------------------------------------------------------------------|-------|------|-----------|
| UL129       | pL1045 (S), pL247 (S), pIE531 (S), pL5212 (S)                                                                                                                                                                                                                                                                                                                                                              |                                                                    | L, IE | L    |           |
| UL130       | pL1045 (S), pL247 (S), pIE531 (S), pL5212 (S)                                                                                                                                                                                                                                                                                                                                                              |                                                                    | L, IE | E-L  |           |
| UL131A      | pL1045 (S), pL247 (S), pIE531 (S), pL5212 (S)                                                                                                                                                                                                                                                                                                                                                              |                                                                    | L, IE | L    |           |
| UL132       | (All in S orientation) pE101218, pL518, pL5318, L-10-4-15, pL443, pL523, pL413, pL713, L-10-1-8                                                                                                                                                                                                                                                                                                            |                                                                    | L, E  | E-L  |           |
| UL148       | (All in S orientation) pE101218, pL518, pL5318, L-10-4-15, pL443, pL523, pL413, pL713, L-10-1-8                                                                                                                                                                                                                                                                                                            |                                                                    | L, E  |      |           |
| J11         | NR                                                                                                                                                                                                                                                                                                                                                                                                         |                                                                    |       | E    |           |
| TRL14 IRL14 | L-7-8-1-4 (S)                                                                                                                                                                                                                                                                                                                                                                                              |                                                                    | L     | E, L |           |
| TRL13 IRL13 | pL443 (S), pL523 (S), pL413 (S), pL713 (S), L-7-8-1-4 (S)                                                                                                                                                                                                                                                                                                                                                  | (79) AD169                                                         | L     | E-L  |           |
| TRL12 IRL12 | NR                                                                                                                                                                                                                                                                                                                                                                                                         |                                                                    |       | E-L  |           |
| TRL11 IRL11 | L-8-1-5 (AS), pL811 (AS)                                                                                                                                                                                                                                                                                                                                                                                   | (3) AD169                                                          | L     | L    |           |
| TRL10 IRL10 | L-8-1-5 (AS)                                                                                                                                                                                                                                                                                                                                                                                               |                                                                    | L     | E-L  |           |
| TRL9 IRL9   | L-8-1-5 (AS), pL811 (AS), pE101213 (AS)                                                                                                                                                                                                                                                                                                                                                                    | (11) Towne                                                         | L, E  | L    |           |
| TRL8 IRL8   | (All in AS orientation) pL417, pL227, L-8-10-5, L-10-4-17, pIE823, L-10-3-6, L-10-4-8, L-10-1-13, L10-1-6, L-10-4-5, pL717, pL1711, L-8-1-5, pL811, pE101213                                                                                                                                                                                                                                               | (11) Towne                                                         | L, E  | L    | L (11)    |
| TRL7 IRL7   | (All in S orientation) pL417, pL227, L-8-10-5, L-10-4-17, pIE823, L-10-3-6, L-10-4-8, L-10-1-13, L-10-1-6, L-10-4-5, pL255, L-8-1-5, pE101213, L-8-1-5, pL811, pE101213, pL1711, pL717                                                                                                                                                                                                                     | (55) AD169                                                         | L, IE | E    | L (11)    |
| TRL6 IRL6   | NR                                                                                                                                                                                                                                                                                                                                                                                                         | (17) AD169                                                         |       | L    | L (17)    |
| TRL4 IRL4   | (Clones in S orientation): pE101350, pL344, pE10222, E-8-2-5, pL6314, pE101121, pL348, pL828, pE10414, pL446, pE104116, pE1033318, pE1012220, pE10319, pE109511, pE10218, pL559, pL441, L-8-1-3, pE1011215, pL519, pL825, pE103312, pL7111, pE1012119, pE102218, pE102212, pE10325, AND 141 clones in transcript group 148 (see suppl. table 1). (Clones in AS orientation): pE103210, pE1012213, pE101032 | (18) Davis<br>(19) Towne<br>(50) AD169<br>(70) Towne<br>(78) AD169 | E, L  | E    | E, L (50) |

|           |                                                                                                                                                                                                                                                                                                                                                                                                                                                                                                                                                                           |                                                                                 |  |                              |
|-----------|---------------------------------------------------------------------------------------------------------------------------------------------------------------------------------------------------------------------------------------------------------------------------------------------------------------------------------------------------------------------------------------------------------------------------------------------------------------------------------------------------------------------------------------------------------------------------|---------------------------------------------------------------------------------|--|------------------------------|
| TRL5 IRL5 | (All in AS orientation) pE109511, pE10218, pL559, pL519, pL825, pE103312, pL7111, pE1012119, pE10325, AND 141 clones in transcript group 148 (see suppl. table 1).                                                                                                                                                                                                                                                                                                                                                                                                        |                                                                                 |  | E, L                         |
| IRL3 RL3  | (Clones in S orientation): pE104119, pE103210, pE1012213, pE101032, pL328, pE1211, pE1012129<br>(Clones in AS orientation): pE10135, pL344, pE10222, E-8-2-5, pL6314, pE101121, pL348, pL828, pE10414, pL446, pE104116, pE1033318, pE1012220, pL827, pL448, L-10-1-5, pE1011211, pE10336, L-10-4-3, pE1012150, pE10331, pE10224, L-10-4-14, pE101221, L-10-3-2, pE10136, pE10122, pL213, pL445, L-10-4-11, pE10319, pE102212, pL245, pL441, L-8-1-3, pE1011215, E-9-1-3, E-8-2-6, E-8-2-2, pE102218, pE10325 AND 141 clones in transcript group 148 (see suppl. table 1). |                                                                                 |  | E, L L                       |
| IRL2      | pE101127 (S), pE103310 (S), pE103213 (S), pE10229, E-8-2-1 (S), pL719 (S), pE10138 (AS), pE10225 (AS), L-10-3-5 (AS), pE10127 (AS), pL332 (AS), L-10-4-10 (AS), E-9-1-2 (AS), pE10332 (AS), pE1012110 (AS), pE101114 (AS), pE104118 (AS), pE101129 (AS), L-10-3-4 (AS), L-10-1-9 (AS), pE1012112 (AS), pE101228 (AS), pE101216 (AS)                                                                                                                                                                                                                                       |                                                                                 |  | E, L E                       |
| RL1 IRL1  | pE101127 (S)                                                                                                                                                                                                                                                                                                                                                                                                                                                                                                                                                              |                                                                                 |  | E                            |
| J11       | NR                                                                                                                                                                                                                                                                                                                                                                                                                                                                                                                                                                        |                                                                                 |  |                              |
| IRS1      | pE1012117 (S), pE101316 (S), pIE934 (S), pL645 (AS)                                                                                                                                                                                                                                                                                                                                                                                                                                                                                                                       | (52) AD169                                                                      |  | E, IE                        |
| US1       | pE1012117 (AS), pE101316 (AS), pIE934 (AS)                                                                                                                                                                                                                                                                                                                                                                                                                                                                                                                                |                                                                                 |  | E, IE                        |
| US2       | NR                                                                                                                                                                                                                                                                                                                                                                                                                                                                                                                                                                        |                                                                                 |  |                              |
| US3       | IE10-1-4 (S), pIE534 (S), pIE536 (S), pIE931 (S), pIE1013 (S)                                                                                                                                                                                                                                                                                                                                                                                                                                                                                                             | (8) Towne<br>(38) Towne<br>(55) AD169<br>(67) AD169<br>(50) AD169<br>(26) AD169 |  | IE IE IE (8, 67); IE, E (50) |
| US4       | pL718 (AS), pL712 (AS)                                                                                                                                                                                                                                                                                                                                                                                                                                                                                                                                                    |                                                                                 |  | L                            |
| US5       | pL718 (AS), pL712 (AS)                                                                                                                                                                                                                                                                                                                                                                                                                                                                                                                                                    |                                                                                 |  | L                            |
| US6       | pL718 (S), pL712 (S)                                                                                                                                                                                                                                                                                                                                                                                                                                                                                                                                                      | (26) AD169                                                                      |  | L E-L E-L (26)               |
| US7       | NR                                                                                                                                                                                                                                                                                                                                                                                                                                                                                                                                                                        | (26) AD169                                                                      |  | E-L E-L, L (26)              |

|       |                                                                         |            |                                                                                     |          |     |           |
|-------|-------------------------------------------------------------------------|------------|-------------------------------------------------------------------------------------|----------|-----|-----------|
| US8   | pE101116 (S), pE1012216 (S), pL612 (S)                                  | (26) AD169 |                                                                                     | E, L     | E   | E (26)    |
| US9   | pE101116 (S), pE1012216 (S), pL612 (S)                                  | (26) AD169 |                                                                                     | E, L     | E   | E (26)    |
| US10  | pE101215 (S)                                                            | (26) AD169 |                                                                                     | E        | E   | E (26)    |
| US11  | pE101215 (S)                                                            | (26) AD169 |                                                                                     | E        | E   | E (26)    |
| US12  | NR                                                                      |            |                                                                                     |          | E   |           |
| US13  | pIE833 (S), pE10329 (S), pL7112 (S)                                     |            |                                                                                     | IE, E, L | E   |           |
| US14  | pE10329 (S), pL7112 (S), pE10427 (S), pL1032 (S), pL7411 (S), pL752 (S) |            |                                                                                     | L, E, IE | E   |           |
| US15  | pE10427 (S), pL1032 (S), pL7411 (S), pL752 (S)                          |            |                                                                                     | L, E     | E-L |           |
| US16  | NR                                                                      |            |                                                                                     |          | E   |           |
| US17  | NR                                                                      |            |                                                                                     |          | E   |           |
| US18  | pL10-4-18 (S), pL516 (S)                                                | (21) Towne | (21) Authors report that no antisense transcripts were found in the US18-20 region. | L        | E   | E, L (21) |
| US19  | pE1011212 (S), pE10132 (S), pE103217 (S)                                | (21) Towne |                                                                                     | E        | E   | E, L (21) |
| US20  | pE1011212 (S), pE10132 (S), pE103217 (S)                                | (21) Towne |                                                                                     | E        | E   | E, L (21) |
| US21  | NR                                                                      |            |                                                                                     |          |     |           |
| US22  | pIE717 (S), pL831 (S)                                                   |            |                                                                                     | IE, L    | E   |           |
| US23  | pL412 (S)                                                               |            |                                                                                     | L        | E   |           |
| US24  | pL412 (S)                                                               |            |                                                                                     | L        | E   |           |
| US25  | NR                                                                      |            |                                                                                     |          | E-L |           |
| US26  | NR                                                                      |            |                                                                                     |          | E   |           |
| US27  | pL415 (S)                                                               | (71) AD169 |                                                                                     | L        | E   | L (71)    |
| US28  | pL1011113 (S), pE1012113 (S), pE101035 (S)                              | (71) AD169 |                                                                                     | E, L     | E   | L (71)    |
| US29  | L-824 (AS), pE103112 (AS), pL521 (AS)                                   |            |                                                                                     | L, E     | E-L |           |
| US30  | L-824 (AS), pE103112 (AS)                                               |            |                                                                                     | E, L     | E   |           |
| US31  | pE103112 (AS)                                                           |            |                                                                                     | E        |     |           |
| US32  | pL719 (S), pL521 (AS)                                                   |            |                                                                                     | L        | L   |           |
| US34  | pE101035 (S), pE1032118 (S), pIE713 (S), pIE624 (S), pIE229 (S)         | (55) AD169 |                                                                                     | IE, E    | E   |           |
| US34A | pE1032118 (S), pIE713 (S), pIE624 (S), pIE229 (S)                       |            |                                                                                     |          |     |           |

|                                     |                                                                   |                          |          |             |
|-------------------------------------|-------------------------------------------------------------------|--------------------------|----------|-------------|
| US33                                | pE101035 (AS), pL719 (AS), pL521 (S), pE1032118 (AS), pIE713 (AS) |                          | IE, E, L | E           |
| US35                                | pE1032118 (AS), pIE713 (AS), pIE624 (AS), pIE229 (AS)             | (11) Towne               | IE, E    | E (11)      |
| US36                                | NR                                                                |                          |          |             |
| TRS1                                | pL645 (AS), pL317 (S)                                             | (62)Towne<br>(52) AD169  | L        | IE (62)     |
| J1S                                 | pL645 (AS)                                                        |                          | L        |             |
| oriLyt-associated vRNA1, vRNA2, SRT | NR                                                                | (48) AD169<br>(23) AD169 |          | SRT, E (23) |

<sup>1</sup> Clones representing all or part of the gene sequences are included; NR, not represented in these libraries.

<sup>2</sup> References listed here include only those studies which ascertained temporal class according to definitions established with the use of protein synthesis and DNA synthesis drug inhibitors.

1. **Adam, B. L., T. Y. Jerve, C. P. Kohler, G. L. Wright, Jr., J. A. Nelson, and R. M. Stenberg.** 1995. The human cytomegalovirus UL98 gene transcription unit overlaps with the pp28 true late gene (UL99) and encodes a 58-kilodalton early protein. *J Virol* **69**:5304-10.
2. **Akrigg, A., G. W. Wilkinson, and J. D. Oram.** 1985. The structure of the major immediate early gene of human cytomegalovirus strain AD169. *Virus Res* **2**:107-21.
3. **Atalay, R., A. Zimmermann, M. Wagner, E. Borst, C. Benz, M. Messerle, and H. Hengel.** 2002. Identification and expression of human cytomegalovirus transcription units coding for two distinct Fcγ receptor homologs. *J Virol* **76**:8596-608.
4. **Awasthi, S., J. A. Isler, and J. C. Alwine.** 2004. Analysis of splice variants of the immediate-early 1 region of human cytomegalovirus. *J Virol* **78**:8191-200.
5. **Battista, M. C., G. Bergamini, M. C. Boccuni, F. Campanini, A. Ripalti, and M. P. Landini.** 1999. Expression and characterization of a novel structural protein of human cytomegalovirus, pUL25. *J Virol* **73**:3800-9.
6. **Bechtel, J. T., and T. Shenk.** 2002. Human cytomegalovirus UL47 tegument protein functions after entry and before immediate-early gene expression. *J Virol* **76**:1043-50.
7. **Bego, M., J. Maciejewski, S. Khaiboullina, G. Pari, and S. St Jeor.** 2005. Characterization of an antisense transcript spanning the UL81-82 locus of human cytomegalovirus. *J Virol* **79**:11022-34.
8. **Biegelke, B. J.** 1995. Regulation of human cytomegalovirus US3 gene transcription by a cis-repressive sequence. *J Virol* **69**:5362-7.
9. **Bogner, E., M. Reschke, B. Reis, T. Mockenhaupt, and K. Radsak.** 1993. Identification of the gene product encoded by ORF UL56 of the human cytomegalovirus genome. *Virology* **196**:290-3.
10. **Boriskin, Y. S., and P. D. Butcher.** 2001. Human cytomegalovirus UL21.5 gene is expressed as an "early-late" gene in cultured human fibroblasts. *Acta Virol* **45**:185-9.

11. **Chambers, J., A. Angulo, D. Amaratunga, H. Guo, Y. Jiang, J. S. Wan, A. Bittner, K. Frueh, M. R. Jackson, P. A. Peterson, M. G. Erlander, and P. Ghazal.** 1999. DNA microarrays of the complex human cytomegalovirus genome: profiling kinetic class with drug sensitivity of viral gene expression. *J Virol* **73**:5757-66.
12. **Chang, C. P., C. L. Malone, and M. F. Stinski.** 1989. A human cytomegalovirus early gene has three inducible promoters that are regulated differentially at various times after infection. *J Virol* **63**:281-90.
13. **Chee, M., S. A. Rudolph, B. Plachter, B. Barrell, and G. Jahn.** 1989. Identification of the major capsid protein gene of human cytomegalovirus. *J Virol* **63**:1345-53.
14. **Courcelle, C. T., J. Courcelle, M. N. Prichard, and E. S. Mocarski.** 2001. Requirement for uracil-DNA glycosylase during the transition to late-phase cytomegalovirus DNA replication. *J Virol* **75**:7592-601.
15. **Davis, M. G., and E. S. Huang.** 1985. Nucleotide sequence of a human cytomegalovirus DNA fragment encoding a 67-kilodalton phosphorylated viral protein. *J Virol* **56**:7-11.
16. **Davis, M. G., E. C. Mar, Y. M. Wu, and E. S. Huang.** 1984. Mapping and expression of a human cytomegalovirus major viral protein. *J Virol* **52**:129-35.
17. **Davison, A. J., P. Akter, C. Cunningham, A. Dolan, C. Addison, D. J. Dargan, A. F. Hassan-Walker, V. C. Emery, P. D. Griffiths, and G. W. Wilkinson.** 2003. Homology between the human cytomegalovirus RL11 gene family and human adenovirus E3 genes. *J Gen Virol* **84**:657-63.
18. **Demarchi, J. M.** 1981. Human cytomegalovirus DNA: restriction enzyme cleavage maps and map locations for immediate-early, early, and late RNAs. *Virology* **114**:23-38.
19. **Gawn, J. M., and R. F. Greaves.** 2002. Absence of IE1 p72 protein function during low-multiplicity infection by human cytomegalovirus results in a broad block to viral delayed-early gene expression. *J Virol* **76**:4441-55.
20. **Geballe, A. P., F. S. Leach, and E. S. Mocarski.** 1986. Regulation of cytomegalovirus late gene expression: gamma genes are controlled by posttranscriptional events. *J Virol* **57**:864-74.
21. **Guo, Y. W., and E. S. Huang.** 1993. Characterization of a structurally tricistronic gene of human cytomegalovirus composed of U(s)18, U(s)19, and U(s)20. *J Virol* **67**:2043-54.
22. **Heilbronn, R., G. Jahn, A. Burkle, U. K. Freese, B. Fleckenstein, and H. zur Hausen.** 1987. Genomic localization, sequence analysis, and transcription of the putative human cytomegalovirus DNA polymerase gene. *J Virol* **61**:119-24.
23. **Huang, L., Y. Zhu, and D. G. Anders.** 1996. The variable 3' ends of a human cytomegalovirus oriLyt transcript (SRT) overlap an essential, conserved replicator element. *J Virol* **70**:5272-81.
24. **Hyun, J. J., H. S. Park, K. H. Kim, and H. J. Kim.** 1999. Analysis of transcripts expressed from the UL47 gene of human cytomegalovirus. *Arch Pharm Res* **22**:542-8.
25. **Jahn, G., T. Kouzarides, M. Mach, B. C. Scholl, B. Plachter, B. Traupe, E. Preddie, S. C. Satchwell, B. Fleckenstein, and B. G. Barrell.** 1987. Map position and nucleotide sequence of the gene for the large structural phosphoprotein of human cytomegalovirus. *J Virol* **61**:1358-67.
26. **Jones, T. R., and V. P. Muzithras.** 1991. Fine mapping of transcripts expressed from the US6 gene family of human cytomegalovirus strain AD169. *J Virol* **65**:2024-36.
27. **Kaye, J., H. Browne, M. Stoffel, and T. Minson.** 1992. The UL16 gene of human cytomegalovirus encodes a glycoprotein that is dispensable for growth in vitro. *J Virol* **66**:6609-15.
28. **Kerry, J. A., A. Sehgal, S. W. Barlow, V. J. Cavanaugh, K. Fish, J. A. Nelson, and R. M. Stenberg.** 1995. Isolation and characterization of a low-abundance splice variant from the human cytomegalovirus major immediate-early gene region. *J Virol* **69**:3868-72.

29. **Kiehl, A., L. Huang, D. Franchi, and D. G. Anders.** 2003. Multiple 5' ends of human cytomegalovirus UL57 transcripts identify a complex, cycloheximide-resistant promoter region that activates oriLyt. *Virology* **314**:410-22.
30. **Kondo, K., and E. S. Mocarski.** 1995. Cytomegalovirus latency and latency-specific transcription in hematopoietic progenitors. *Scand J Infect Dis Suppl* **99**:63-7.
31. **Kotenko, S. V., S. Sacconi, L. S. Izotova, O. V. Mirochnitchenko, and S. Pestka.** 2000. Human cytomegalovirus harbors its own unique IL-10 homolog (cmvIL-10). *Proc Natl Acad Sci U S A* **97**:1695-700.
32. **Kouzarides, T., A. T. Bankier, S. C. Satchwell, E. Preddy, and B. G. Barrell.** 1988. An immediate early gene of human cytomegalovirus encodes a potential membrane glycoprotein. *Virology* **165**:151-64.
33. **Kouzarides, T., A. T. Bankier, S. C. Satchwell, K. Weston, P. Tomlinson, and B. G. Barrell.** 1987. Sequence and transcription analysis of the human cytomegalovirus DNA polymerase gene. *J Virol* **61**:125-33.
34. **Kulesza, C. A., and T. Shenk.** 2004. Human cytomegalovirus 5-kilobase immediate-early RNA is a stable intron. *J Virol* **78**:13182-9.
35. **Leach, F. S., and E. S. Mocarski.** 1989. Regulation of cytomegalovirus late-gene expression: differential use of three start sites in the transcriptional activation of ICP36 gene expression. *J Virol* **63**:1783-91.
36. **Leatham, M. P., P. R. Witte, and M. F. Stinski.** 1991. Alternate promoter selection within a human cytomegalovirus immediate-early and early transcription unit (UL119-115) defines true late transcripts containing open reading frames for putative viral glycoproteins. *J Virol* **65**:6144-53.
37. **Lehner, R., H. Meyer, and M. Mach.** 1989. Identification and characterization of a human cytomegalovirus gene coding for a membrane protein that is conserved among human herpesviruses. *J Virol* **63**:3792-800.
38. **Liu, W., Y. Zhao, and B. Biegelke.** 2002. Analysis of human cytomegalovirus US3 gene products. *Virology* **301**:32-42.
39. **Liu, Y., and B. J. Biegelke.** 2002. The human cytomegalovirus UL35 gene encodes two proteins with different functions. *J Virol* **76**:2460-8.
40. **Lockridge, K. M., S. S. Zhou, R. H. Kravitz, J. L. Johnson, E. T. Sawai, E. L. Blewett, and P. A. Barry.** 2000. Primate cytomegaloviruses encode and express an IL-10-like protein. *Virology* **268**:272-80.
41. **Lundquist, C. A., J. L. Meier, and M. F. Stinski.** 1999. A strong negative transcriptional regulatory region between the human cytomegalovirus UL127 gene and the major immediate-early enhancer. *J Virol* **73**:9039-52.
42. **Martinez, J., R. S. Lahijani, and S. C. St Jeor.** 1989. Analysis of a region of the human cytomegalovirus (AD169) genome coding for a 25-kilodalton virion protein. *J Virol* **63**:233-41.
43. **Meier, J. L., and M. F. Stinski.** 1997. Effect of a modulator deletion on transcription of the human cytomegalovirus major immediate-early genes in infected undifferentiated and differentiated cells. *J Virol* **71**:1246-55.
44. **Mocarski, E. S., L. Pereira, and N. Michael.** 1985. Precise localization of genes on large animal virus genomes: use of lambda gt11 and monoclonal antibodies to map the gene for a cytomegalovirus protein family. *Proc Natl Acad Sci U S A* **82**:1266-70.
45. **Nowak, B., A. Gmeiner, P. Sarnow, A. J. Levine, and B. Fleckenstein.** 1984. Physical mapping of human cytomegalovirus genes: identification of DNA sequences coding for a virion phosphoprotein of 71 kDa and a viral 65-kDa polypeptide. *Virology* **134**:91-102.
46. **Pachl, C., W. S. Probert, K. M. Hermsen, F. R. Masiarz, L. Rasmussen, T. C. Merigan, and R. R. Spaete.** 1989. The human cytomegalovirus strain Towne glycoprotein H gene encodes glycoprotein p86. *Virology* **169**:418-26.
47. **Plachter, B., B. Traupe, J. Albrecht, and G. Jahn.** 1988. Abundant 5 kb RNA of human cytomegalovirus without a major translational reading frame. *J Gen Virol* **69 (Pt 9)**:2251-66.
48. **Prichard, M. N., S. Jairath, M. E. Penfold, S. St Jeor, M. C. Bohlman, and G. S. Pari.** 1998. Identification of persistent RNA-DNA hybrid structures within the origin of replication of human cytomegalovirus. *J Virol* **72**:6997-7004.

49. **Puchtler, E., and T. Stamminger.** 1991. An inducible promoter mediates abundant expression from the immediate-early 2 gene region of human cytomegalovirus at late times after infection. *J Virol* **65**:6301-6.
50. **Rawlinson, W. D., and B. G. Barrell.** 1993. Spliced transcripts of human cytomegalovirus. *J Virol* **67**:5502-13.
51. **Razzaque, A., N. Jahan, D. McWeeney, R. J. Jariwalla, C. Jones, J. Brady, and L. J. Rosenthal.** 1988. Localization and DNA sequence analysis of the transforming domain (mtrII) of human cytomegalovirus. *Proc Natl Acad Sci U S A* **85**:5709-13.
52. **Romanowski, M. J., and T. Shenk.** 1997. Characterization of the human cytomegalovirus *irs1* and *trs1* genes: a second immediate-early transcription unit within *irs1* whose product antagonizes transcriptional activation. *J Virol* **71**:1485-96.
53. **Rudolph, S. A., T. Stamminger, and G. Jahn.** 1990. Transcriptional analysis of the eight-kilobase mRNA encoding the major capsid protein of human cytomegalovirus. *J Virol* **64**:5167-72.
54. **Ruger, B., S. Klages, B. Walla, J. Albrecht, B. Fleckenstein, P. Tomlinson, and B. Barrell.** 1987. Primary structure and transcription of the genes coding for the two virion phosphoproteins pp65 and pp71 of human cytomegalovirus. *J Virol* **61**:446-53.
55. **Scott, G. M., B. G. Barrell, J. Oram, and W. D. Rawlinson.** 2002. Characterisation of transcripts from the human cytomegalovirus genes TRL7, UL20a, UL36, UL65, UL94, US3 and US34. *Virus Genes* **24**:39-48.
56. **Smith, J. A., S. Jairath, J. J. Crute, and G. S. Pari.** 1996. Characterization of the human cytomegalovirus UL105 gene and identification of the putative helicase protein. *Virology* **220**:251-5.
57. **Smith, J. A., and G. S. Pari.** 1995. Human cytomegalovirus UL102 gene. *J Virol* **69**:1734-40.
58. **Smuda, C., E. Bogner, and K. Radsak.** 1997. The human cytomegalovirus glycoprotein B gene (ORF UL55) is expressed early in the infectious cycle. *J Gen Virol* **78 (Pt 8)**:1981-92.
59. **Stamminger, T., M. Gstaiger, K. Weinzierl, K. Lorz, M. Winkler, and W. Schaffner.** 2002. Open reading frame UL26 of human cytomegalovirus encodes a novel tegument protein that contains a strong transcriptional activation domain. *J Virol* **76**:4836-47.
60. **Stamminger, T., E. Puchtler, and B. Fleckenstein.** 1991. Discordant expression of the immediate-early 1 and 2 gene regions of human cytomegalovirus at early times after infection involves posttranscriptional processing events. *J Virol* **65**:2273-82.
61. **Staprans, S. I., and D. H. Spector.** 1986. 2.2-kilobase class of early transcripts encoded by cell-related sequences in human cytomegalovirus strain AD169. *J Virol* **57**:591-602.
62. **Stasiak, P. C., and E. S. Mocarski.** 1992. Transactivation of the cytomegalovirus ICP36 gene promoter requires the alpha gene product TRS1 in addition to IE1 and IE2. *J Virol* **66**:1050-8.
63. **Stenberg, R. M., A. S. Depto, J. Fortney, and J. A. Nelson.** 1989. Regulated expression of early and late RNAs and proteins from the human cytomegalovirus immediate-early gene region. *J Virol* **63**:2699-708.
64. **Stenberg, R. M., D. R. Thomsen, and M. F. Stinski.** 1984. Structural analysis of the major immediate early gene of human cytomegalovirus. *J Virol* **49**:190-9.
65. **Su, Y., J. R. Testaverde, C. N. Davis, W. A. Hayajneh, R. Adair, and A. M. Colberg-Poley.** 2003. Human cytomegalovirus UL37 immediate early target minigene RNAs are accurately spliced and polyadenylated. *J Gen Virol* **84**:29-39.
66. **Tenney, D. J., and A. M. Colberg-Poley.** 1991. Expression of the human cytomegalovirus UL36-38 immediate early region during permissive infection. *Virology* **182**:199-210.
67. **Tenney, D. J., and A. M. Colberg-Poley.** 1991. Human cytomegalovirus UL36-38 and US3 immediate-early genes: temporally regulated expression of nuclear, cytoplasmic, and polysome-associated transcripts during infection. *J Virol* **65**:6724-34.
68. **Tenney, D. J., and A. M. Colberg-Poley.** 1990. RNA analysis and isolation of cDNAs derived from the human cytomegalovirus immediate-early region at 0.24 map units. *Intervirology* **31**:203-14.

69. **Ulbrecht, M., S. Martinozzi, M. Grzeschik, H. Hengel, J. W. Ellwart, M. Pla, and E. H. Weiss.** 2000. Cutting edge: the human cytomegalovirus UL40 gene product contains a ligand for HLA-E and prevents NK cell-mediated lysis. *J Immunol* **164**:5019-22.
70. **Wathen, M. W., and M. F. Stinski.** 1982. Temporal patterns of human cytomegalovirus transcription: mapping the viral RNAs synthesized at immediate early, early, and late times after infection. *J Virol* **41**:462-77.
71. **Welch, A. R., L. M. McGregor, and W. Gibson.** 1991. Cytomegalovirus homologs of cellular G protein-coupled receptor genes are transcribed. *J Virol* **65**:3915-8.
72. **Welch, A. R., L. M. McNally, and W. Gibson.** 1991. Cytomegalovirus assembly protein nested gene family: four 3'-coterminally transcribed transcripts encode four in-frame, overlapping proteins. *J Virol* **65**:4091-100.
73. **Weston, K.** 1988. An enhancer element in the short unique region of human cytomegalovirus regulates the production of a group of abundant immediate early transcripts. *Virology* **162**:406-16.
74. **Wing, B. A., and E. S. Huang.** 1995. Analysis and mapping of a family of 3'-coterminally transcribed transcripts containing coding sequences for human cytomegalovirus open reading frames UL93 through UL99. *J Virol* **69**:1521-31.
75. **Wing, B. A., G. C. Lee, and E. S. Huang.** 1996. The human cytomegalovirus UL94 open reading frame encodes a conserved herpesvirus capsid/tegument-associated virion protein that is expressed with true late kinetics. *J Virol* **70**:3339-45.
76. **Winkler, M., S. A. Rice, and T. Stamminger.** 1994. UL69 of human cytomegalovirus, an open reading frame with homology to ICP27 of herpes simplex virus, encodes a transactivator of gene expression. *J Virol* **68**:3943-54.
77. **Wright, D. A., and D. H. Spector.** 1989. Posttranscriptional regulation of a class of human cytomegalovirus phosphoproteins encoded by an early transcription unit. *J Virol* **63**:3117-27.
78. **Wu, T. C., W. A. Lee, M. C. Pizzorno, W. C. Au, Y. J. Chan, R. H. Hruban, G. M. Hutchins, and G. S. Hayward.** 1992. Localization of the human cytomegalovirus 2.7-kb major early beta-gene transcripts by RNA in situ hybridization in permissive and nonpermissive infections. *Am J Pathol* **141**:1247-54.
79. **Yu, D., G. A. Smith, L. W. Enquist, and T. Shenk.** 2002. Construction of a self-excisable bacterial artificial chromosome containing the human cytomegalovirus genome and mutagenesis of the diploid TRL/IRL13 gene. *J Virol* **76**:2316-28.
