# Supplementary material
Source: PubMed Central journal article supplement (PMC2045512)
Supplement: jvirol_81_20_11267__3.pdf [file jvirol_81_20_11267__3.pdf]

Supplemental Table 3.

Clones Harboring AS Sequences Confirmed by Sequence Analysis to Possess Genuine Poly (A) Tails\*

|    | Overlapping Gene (orientation)                                                     | Clone Name | Genome Position                         | Polyadenylation Signal |
|----|------------------------------------------------------------------------------------|------------|-----------------------------------------|------------------------|
| 1  | UL1 (S), UL2 (AS), UL3 (AS), UL4 (S), UL5 (S), UL6 (S)                             | pL321      | 11909-14737                             | 14747-14752            |
| 2  |                                                                                    | pE10226    | 12202-14744                             | 14752-14752            |
| 3  | UL3 (AS), UL4 (S), UL5 (S), UL6 (S)                                                | pL724      | 13076-14769                             | 14747-14752            |
| 4  | UL12 (AS), UL13 (S)                                                                | pL1016     | 19140-19316 + 19414-20839               | 20806-20811            |
| 5  |                                                                                    | pL716      | 19140-19316 + 19414-20839               | 20806-20811            |
| 6  | UL13 (AS), UL12 (S), UL11 (AS)                                                     | pE102216   | 20406-19436 + 19336-18548               | 18560-18555            |
| 7  | UL20 (S), UL21 (AS), UL22A (S)                                                     | IE8-7-1-1  | 25303-25574 + 26637-27194 + 27279-27581 | 27551-27556            |
| 8  |                                                                                    | pIE9-2-1   | 25314-25574 + 26637-27195 + 27275-27485 | 27464-27469            |
| 9  | UL24 (AS), UL25 (S)                                                                | pL8212     | 28949-32166                             | 32114-32119            |
| 10 | UL25 (AS), UL24 (S), UL23 (S)                                                      | pIE811     | 31019-30116 --- 28579-27816             | 27811-27806            |
| 11 | UL27(AS), UL28 (AS), UL29 (AS), UL30 (AS)                                          | pL551      | 33798-34671 --- 36336-37255             | 37236-37241            |
| 12 | UL29 (S), UL22A (AS), UL21 (S)                                                     | pIE526     | 37099-35929 + 27206-26444               | 26470-26465            |
| 13 |                                                                                    | pIE912     | 37099-35929 + 27206-26444               | 26470-26465            |
| 14 |                                                                                    | pIE626     | 37095-35929 + 27206-26444               | 26470-26465            |
| 15 | UL36 (AS), UL37 (AS)                                                               | pE104114   | 49135-51094                             | ND                     |
| 16 | UL52 (AS), UL37 (S), UL36 (S)                                                      | pL258      | 76158-76097 + 50590-49577 + 49473-48094 | 48116-48111            |
| 17 | UL49 (S), UL48A (S), UL48 (AS)                                                     | pE1011210  | 71672-71537 + 71392-70063               | 70082-70077            |
| 18 | UL61(AS), UL62 (AS), UL63 (S), UL64 (AS), UL65 (S), UL66 (AS), UL67(AS), UL68 (AS) | pL629      | 94162-94386 --- 97770-98837             | 98806-98811            |
| 19 |                                                                                    | pL638      | 94162-94363 --- 97949-98837             | 98806-98811            |
| 20 |                                                                                    | pL831      | 94237-94575 --- 97919-98837             | 98806-98811            |
| 21 | UL61(AS), UL62 (AS), UL63 (S), UL64 (AS), UL65 (S), UL66 (AS), UL67(AS), UL68 (AS) | pE103314   | 94462-95362 --- 97789-98837             | 98806-98811            |
| 22 |                                                                                    | pE10335    | 94467-98837                             | 98806-98811            |
| 23 |                                                                                    | pE109512   | 94649-95667 --- 97798-98837             | 98806-98811            |
| 24 | UL61(AS), UL62 (AS), UL63 (S), UL64 (AS), UL65 (S), UL66 (AS), UL67(AS), UL68 (AS) | pL756      | 94837-95739 --- 97856-98837             | 98806-98811            |
| 25 | UL62 (AS), UL63 (S), UL64 (AS), UL65 (S), UL66 (AS), UL67(AS), UL68 (AS)           | pL937      | 95415-96478 --- 97849-98837             | 98806-98811            |
| 26 | UL63 (S), UL64 (AS), UL65 (S), UL66 (AS), UL67(AS), UL68 (AS)                      | pL5317     | 95749-96669 --- 98258-98837             | 98806-98811            |
| 27 | UL63 (S), UL64 (AS), UL65 (S), UL66 (AS), UL67(AS), UL68 (AS)                      | pL524      | 96042-97185 --- 98255-98837             | 98806-98811            |
| 28 |                                                                                    | pE10338    | 96047-97186 --- 98019-98840             | 98806-98811            |
| 29 |                                                                                    | pE10415    | 96054-97116 --- 97759-98837             | 98806-98811            |
| 30 | UL64 (AS), UL65 (S), UL66 (AS), UL67(AS), UL68 (AS)                                | pL647      | 96681-97492 --- 97787-98837             | 98806-98811            |
| 31 |                                                                                    | pL338      | 96875-98837                             | 98806-98811            |
| 32 |                                                                                    | pL717      | 97108-98405 + 98425-98837               | 98806-98811            |
| 33 | UL65 (AS), UL64 (S), UL63 (AS), UL62 (S), UL61 (S)                                 | pL233      | 97297-96388 --- 95728-94779             | 94780-94795            |
| 34 | UL70 (AS), UL71 (S), UL72 (AS)                                                     | pL5511     | 102599-103523 --- 104754-105546         | 105527-105532          |
| 35 | UL72 (AS), UL73 (S), UL74 (AS)                                                     | pE104111   | 105765-107122 + 108462-108697           | 108660-108665          |

|    |                                                             |           |                                                                                      |                |
|----|-------------------------------------------------------------|-----------|--------------------------------------------------------------------------------------|----------------|
| 36 |                                                             | pL6311    | 106326-107122 + 108462-108697                                                        | 108660-108665  |
| 37 |                                                             | L-10-1-4  | 106595-107122 + 108462-108697                                                        | 108660-108665  |
| 38 | UL88 (AS), UL87 (AS)                                        | pL339     | 133049-132010 --- 131325-130420                                                      | 130444 -130439 |
| 39 | UL89 (S), UL92 (AS), UL88 (AS), UL87 (AS)                   | pL2212    | 135422-135179 + 134530-133843<br>--- 131318-130420                                   | 130444-130439  |
| 40 |                                                             | pL222     | 150176-148864                                                                        | 148883-148878  |
| 41 | UL102 (AS)                                                  | pL539     | 161296-160563 + 156034-155740                                                        | 155760-155755  |
| 42 | UL111A (AS), UL111 (S), UL106 (S)                           | pL3211    | 167651-167143 + 167081-167001<br>+ 162130-160560 + 161221-<br>160563 + 156037-155740 | 155760-155755  |
| 43 | UL117 (S), UL112 (AS), UL111A (AS),<br>UL111 (S), UL106 (S) | pE101038  | 3176-2091                                                                            | 2113-2108      |
| 44 | RL2 (AS)                                                    | pE10225   | 187248-188307                                                                        | 188285-188290  |
| 45 |                                                             | L-10-3-5  | 187277-188307                                                                        | 188285-188290  |
| 46 |                                                             | pL332     | 187320-188307                                                                        | 188285-188290  |
| 47 |                                                             | L-10-4-10 | 3037-2091                                                                            | 2113-2108      |
| 48 |                                                             | pL417     | 7357-6340                                                                            | 6365-6360      |
| 49 | RL8 (AS), RL7 (S)                                           | pL227     | 7356-6340                                                                            | 6365-6360      |
| 50 |                                                             | L-8-10-5  | 7351-6340                                                                            | 6365-6360      |
| 51 |                                                             | L-10-4-17 | 183048-184060                                                                        | 184033-184038  |
| 52 |                                                             | pIE823    | 7346-6340                                                                            | ND             |
| 53 |                                                             | L-10-3-6  | 7331-6340                                                                            | 6365-6360      |
| 54 |                                                             | L-10-4-8  | 183067-184060                                                                        | 184033-184038  |
| 55 |                                                             | L-10-1-13 | 183067-184060                                                                        | 184033-184038  |
| 56 |                                                             | L-10-1-6  | 183069-184060                                                                        | 184033-184038  |
| 57 |                                                             | L-10-4-5  | 183085-184060                                                                        | 184033-184038  |
| 58 |                                                             | pL717     | 183067-184060                                                                        | 184033-184038  |
| 59 |                                                             | pL1711    | 7351-6340                                                                            | 6365-6360      |
| 60 |                                                             | L-8-1-5   | 181290-181998 + 182621-184060                                                        | 184033-184038  |
| 61 | RL11(AS), RL10 (AS), RL9 (AS), RL8 (AS),<br>RL7 (S)         | pL811     | 181111-181273 + 182621-184060                                                        | 184033-184038  |
| 62 | RL11 (AS), RL9 (AS), RL8 (AS), RL7 (S)                      | pE101213  | 182416-184060                                                                        | 184033-184038  |
| 63 | RL9 (AS), RL8 (AS), RL7 (S)                                 | pE1012117 | 192755-194003                                                                        | 193969-193974  |
| 64 | TRS1 (AS), J1S (AS)                                         | pL645     | 228454-229856                                                                        | 229826-229832  |
| 65 | US28 (S), US33 (AS), US34 (S)                               | pE103112  | 224212-222419 + 222328-222143                                                        | 222164-222159  |
| 66 | US31 (AS), US30 (AS), US29 (AS)                             | pL521     | 225350-224414 + 222458-222421<br>--- 22253-221298                                    | 221317-221312  |
| 67 | US33 (S), US32 (AS), US29 (AS)                              | pIE624    | 225418-226226                                                                        | 226202-226207  |
| 68 | US34 (S), US34A (S), US35 (AS)                              | pIE229    | 225422-226212                                                                        | 226202-226207  |

\*Note that orphaned AS transcripts (Table 5) were excluded from this analysis. Genome positions and presumptive poly (A) signals are reported relative to Genbank Accession NC\_001347. A plus sign indicates presumptive splicing. Multiple dashes indicate that sequence runs from the 5' and 3' ends did not overlap. Because not all clones listed in Supplemental Table 1 were sequenced from the 3' ends, this list should be considered provisional. ND, not determined.
